# Supplementary material for: Extreme Gradient Boosting Combined with Conformal Predictors for Informative Solubility Estimation
Source: MDPI journal article supplement (doi:10.3390/molecules29010019), 2023-12-19
Supplement: s1 [file s1]

# Supplementary documentation

## Extreme Gradient Boosting combined with Conformal Predictors for Informative Solubility Estimation of Public Databases

**Ozren Jovic, Rabah Mouras\***

*Pharmaceutical Manufacturing Technology Centre Department, Bernal Institute, Department of Chemical Sciences, University of Limerick, Limerick, Republic of Ireland*

E-mails: [ozren.jovic@ul.ie](mailto:ozren.jovic@ul.ie) , [rabah.mouras@ul.ie](mailto:rabah.mouras@ul.ie)

\*Corresponding author, phone number: +353892203838

## Table of contents

|                                                                                                                    |    |
|--------------------------------------------------------------------------------------------------------------------|----|
| Table of contents.....                                                                                             | 2  |
| Supporting Info Tables S1a-b. Comparison between XGB and RF methodologies on smaller data sets (1, 4-6).....       | 3  |
| Supplementary figures S1-S3. Prediction performance of XGB and FSTI-XGB.....                                       | 4  |
| Supporting Info section S1: Selected molecular descriptors using FSTI-XGB for data sets (1, 4-6).....              | 5  |
| Supporting Info Section S2: Detailed comments on Ref. [25 in main article] that studied curated AqSolDB.....       | 11 |
| Supporting Info Section S3: Tables S2a-p: Conformal predictor results with FSTI-XGB and XGB models.....            | 13 |
| Info section S4: CP estimation of the LogS $\pm$ 1 Accuracy on Databases void of experimental LogS.....            | 30 |
| Supplementary figures S4-S5. Prediction intervals vs. Molecular weights (S4) and FSTI-XGB vs AlogPS.....           | 34 |
| Info section S5: Python code for obtaining Padel and rdkit molecular descriptors from smiles.....                  | 35 |
| Info section S6: Calculation of ORCA SMD solvation Gibbs free energy.....                                          | 37 |
| Info section S7: Names and meaning of used QMvars for Methanol data set.....                                       | 38 |
| Info section S8: Names of QMvars of Water-wide, Ethanol and Acetone data sets.....                                 | 39 |
| Info section S9: Calculation of NC measure for any number of calibration samples of certain confidence levels..... | 40 |

**Supporting Info Table S1a.** The comparison between XGB and RF methodologies on the remaining four smaller data sets using all disposable variables that passed preprocessing. "P+QM" presents Padel and QM variables.

| Dataset, vars type,<br>(number of vars) | set<br>size | RF fine-tuned |        |           |        |       | XGB    |        |           |        |       |
|-----------------------------------------|-------------|---------------|--------|-----------|--------|-------|--------|--------|-----------|--------|-------|
|                                         |             | RMSE          |        | %LogS±1.0 |        |       | RMSE   |        | %LogS±1.0 |        |       |
|                                         |             | CV-set        | V-set  | RMSEtot   | CV-set | V-set | CV-set | V-set  | RMSEtot   | CV-set | V-set |
| Water, P+QM (1156)                      | 900         | 0.8826        | 0.8077 | 0.8493    | 79.4   | 84.0  | 0.8566 | 0.8257 | 0.8429    | 83.2   | 82.2  |
| Ethanol, P+QM(1224)                     | 695         | 0.7636        | 0.7863 | 0.7681    | 82.6   | 82.7  | 0.7135 | 0.7815 | 0.7437    | 89.7   | 82.0  |
| Acetone, P+QM (1019)                    | 452         | 0.7331        | 0.6662 | 0.7196    | 84.8   | 89.0  | 0.6901 | 0.7161 | 0.6953    | 88.9   | 83.5  |
| Methanol, P+QM (1108)                   | 135         | 0.9534        | 0.7516 | 0.8896    | 71.7   | 83.3  | 0.9197 | 0.7735 | 0.8807    | 68.7   | 86.1  |

**Supporting Info Table S1b.** Continued to Table S1a.

| Dataset, vars type,<br>(number of vars) | total<br>set size | %LogS±07        |                    |               |       |        |       |
|-----------------------------------------|-------------------|-----------------|--------------------|---------------|-------|--------|-------|
|                                         |                   | CV-<br>training |                    | RF fine-tuned |       | XGB    |       |
|                                         |                   | set size        | V-test<br>set size | CV-set        | V-set | CV-set | V-set |
| Water, P+QM (1156)                      | 900               | 500             | 400                | 66.2          | 69.5  | 66.0   | 70.5  |
| Ethanol, P+QM (1224)                    | 695               | 556             | 139                | 66.7          | 68.3  | 71.8   | 67.6  |
| Acetone, P+QM (1019)                    | 452               | 361             | 91                 | 69.3          | 69.2  | 72.6   | 69.2  |
| Methanol, P+QM (1108)                   | 135               | 99              | 36                 | 56.5          | 63.9  | 52.5   | 63.9  |

Comments related to Table S1:

- (a) The data sets are of smaller set sizes than AqSolDB sets and carry less statistical weight. So in these tables, no statistically significant difference could be established between RF and XGB.
- (b) RMSEtot is in very slight favor of XGB, but the overall results are not entirely in favor of XGB, although CV-statistics is mostly advantageous for XGB as CV-sets contain more samples than V-sets, and RF is in no slight advantage when taking into account all validation set statistics.
- (c) The task of the paper is to select the better-performing methodology and to use it in modeling the large AquaSolDB data sets. So the higher accent is in comparison of model performances on large AquaSolDB data sets (2-3). That is why, these results were not put into the main article. Too many tables in the Results and Discussion section could lead to confusion. But, these tables can serve as supporting information tables.

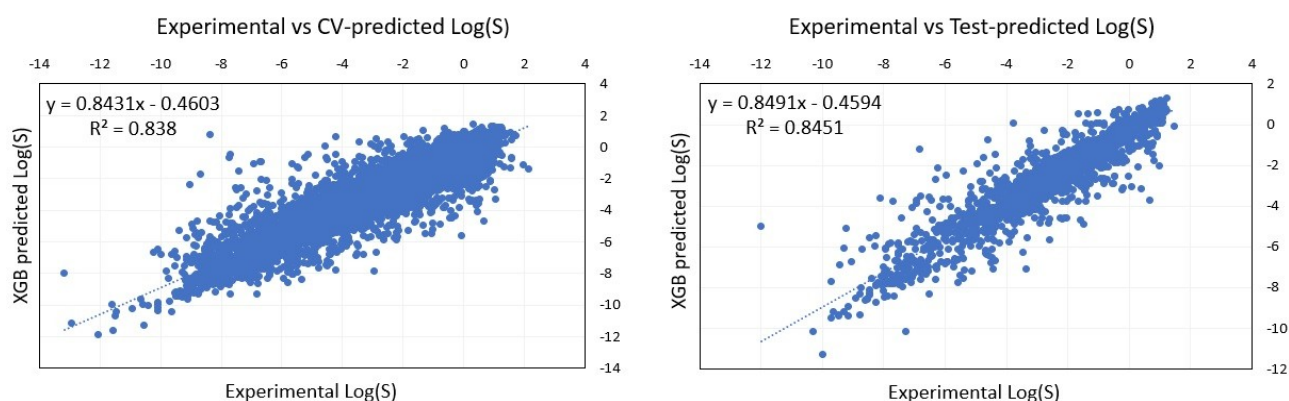

**Supplementary Figure S1.** Prediction performance of the XGB model (RMSECV = 0.9429, RMSEV = 0.9243) on the data set (2), with a number of descriptors = 1146. max\_depth = 5, eta = 0.1, nrounds= 465. 95%, non-normalized half-width = 1.9658.

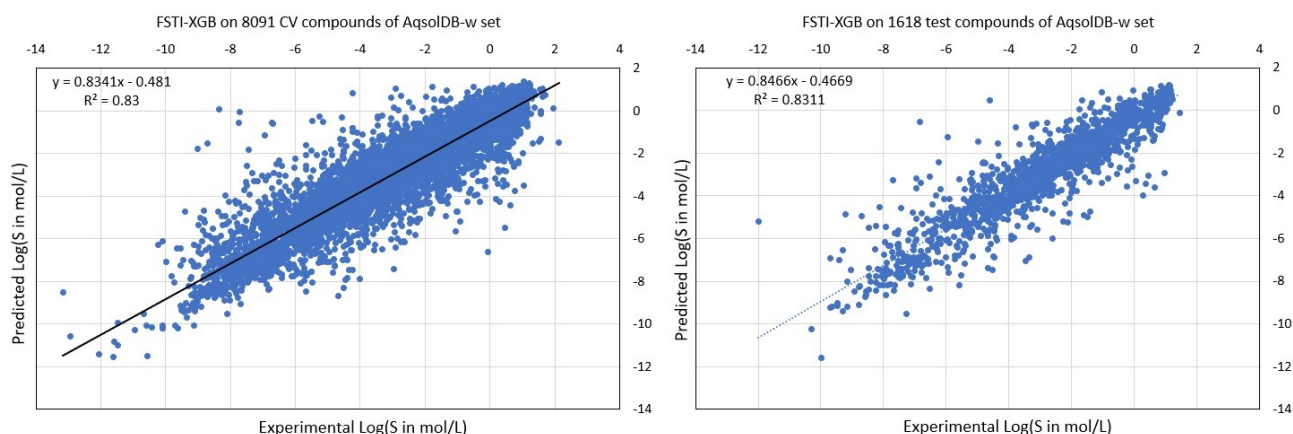

**Figure S2.** Prediction performance of FSTI-XGB model on AqSolDB-w set (3), with a number of molecular descriptors = 32.

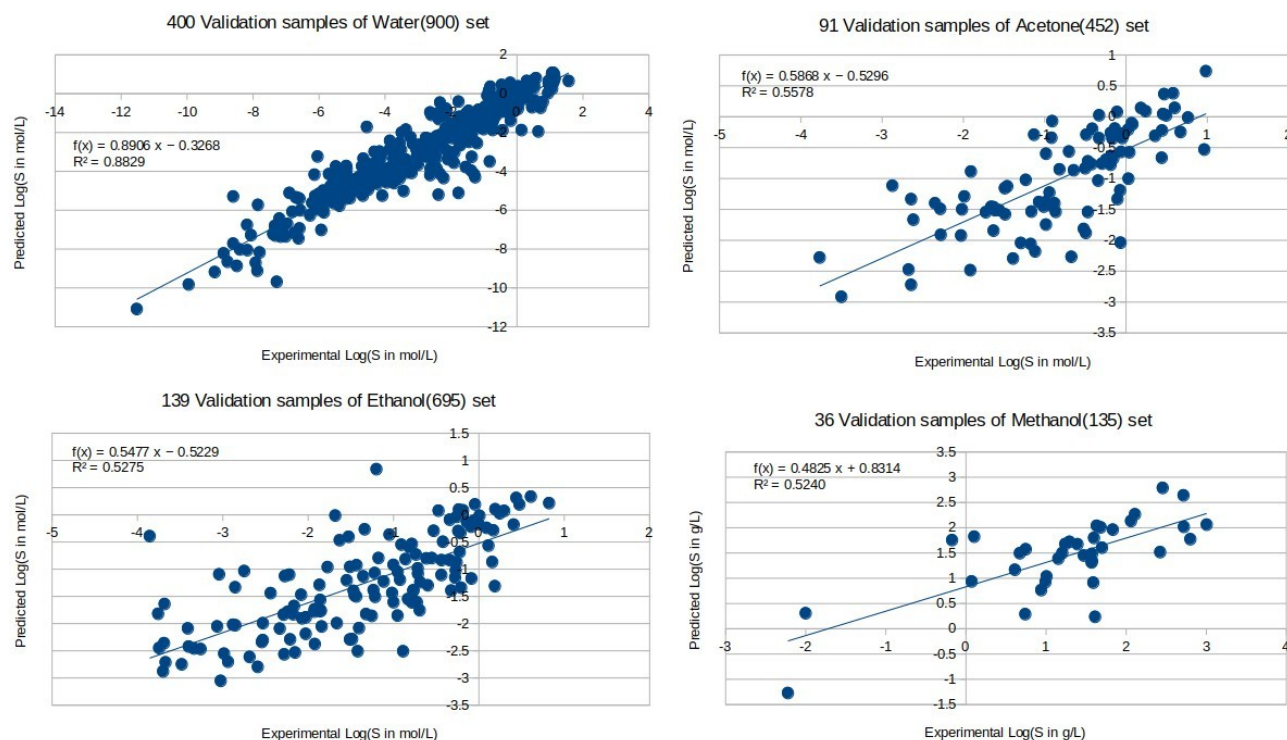

**Figure S3.** Experimental Log(S) vs ML predicted Log(S) of the final FSTI-XGB models whose performance is shown in Table 5. The top-left figure depicts statistics for 400 test validation samples of the Water data set. The top-right figure depicts statistics for 91 test validation samples. The bottom-left figure depicts statistics for 139 test validation samples from the Ethanol data set. The bottom-right figure displays statistics for 36 test validation samples of the Methanol data set.

#### Info section S1: Selected molecular descriptors using FSTI-XGB for data sets (1, 4-6)

All selected variables for Methanol (data set (1)) sorted by variable's top-down importance are:  
 XLogP,  $\Delta H_{fus.}$ .kJ.mol.<sup>-1</sup>, MLFER\_E, AATS8p, MATS3e, deltaG.aver, AATSC5m, nAtomP, GATS6i, ATSC6i, GATS3p, nAtomLAC, VR1\_Dzs, MLFER\_L, GATS4s, ATSC2e, GATS4e, ATSC4i, ZMIC2, AATSC5s, AATS1p, MATS5e, ETA\_Shape\_Y, R\_TpiPCTPC, minsCH3, SIC0, minaaC, JGI6, Kier3, AATS3e, SpMax3\_Bhm, MATS1m, AMR, VC.5.

Importance metric (from XLogP (Gain=1.403162e-01) to VC.5 (Gain=9.036388e-05)):

```
> xgb.importance(colnames(Fe2), model = model_xgboost)
F2[1,as.numeric(c(xgb.importance(colnames(Fe2), model = model_xgboost)[,1])$Feature)]
```

|     | Feature | Gain         | Cover       | Frequency   |
|-----|---------|--------------|-------------|-------------|
| 1:  | 1       | 1.403162e-01 | 0.085336443 | 0.110332750 |
| 2:  | 2       | 8.953146e-02 | 0.041475631 | 0.071803853 |
| 3:  | 3       | 7.595728e-02 | 0.026979037 | 0.031523643 |
| 4:  | 5       | 6.519174e-02 | 0.008480640 | 0.017513135 |
| 5:  | 22      | 5.203537e-02 | 0.035168155 | 0.028021016 |
| 6:  | 16      | 4.500070e-02 | 0.017305807 | 0.017513135 |
| 7:  | 17      | 4.380952e-02 | 0.073384040 | 0.064798599 |
| 8:  | 34      | 3.717002e-02 | 0.037102801 | 0.029772329 |
| 9:  | 13      | 3.626000e-02 | 0.034214083 | 0.028021016 |
| 10: | 4       | 3.585096e-02 | 0.024196327 | 0.028021016 |
| 11: | 9       | 3.384537e-02 | 0.010812816 | 0.015761821 |
| 12: | 11      | 2.981285e-02 | 0.017279305 | 0.015761821 |
| 13: | 33      | 2.597081e-02 | 0.031908409 | 0.029772329 |
| 14: | 12      | 2.228739e-02 | 0.008321628 | 0.010507881 |
| 15: | 27      | 2.159036e-02 | 0.029920759 | 0.028021016 |
| 16: | 7       | 2.144631e-02 | 0.049399730 | 0.036777583 |
| 17: | 10      | 2.089681e-02 | 0.040521559 | 0.038528897 |
| 18: | 31      | 2.066779e-02 | 0.044496860 | 0.035026270 |
| 19: | 19      | 1.980454e-02 | 0.012084912 | 0.014010508 |
| 20: | 29      | 1.900009e-02 | 0.036625765 | 0.035026270 |
| 21: | 20      | 1.834659e-02 | 0.019584979 | 0.015761821 |
| 22: | 6       | 1.728677e-02 | 0.003630774 | 0.010507881 |
| 23: | 23      | 1.718512e-02 | 0.083799327 | 0.064798599 |
| 24: | 26      | 1.716239e-02 | 0.015768691 | 0.021015762 |
| 25: | 24      | 1.174938e-02 | 0.030636313 | 0.031523643 |
| 26: | 28      | 1.150608e-02 | 0.027058543 | 0.028021016 |
| 27: | 30      | 1.034209e-02 | 0.016113217 | 0.012259194 |
| 28: | 8       | 1.013454e-02 | 0.020910079 | 0.019264448 |
| 29: | 25      | 8.535835e-03 | 0.025282909 | 0.021015762 |
| 30: | 21      | 8.158879e-03 | 0.032650465 | 0.024518389 |
| 31: | 15      | 7.298207e-03 | 0.047226566 | 0.040280210 |
| 32: | 18      | 4.966952e-03 | 0.005962950 | 0.017513135 |
| 33: | 14      | 7.912693e-04 | 0.001457610 | 0.003502627 |
| 34: | 32      | 9.036388e-05 | 0.004902870 | 0.003502627 |

All selected variables for AqSolDB-w (data set (2)) sorted by variable's top-down importance are: MolLogP, XLogP, TpiPC, BalabanJ, BertzCT, AATS1i, MolWt, GATS1s, AATSC2e, piPC1, GATS2c, TPSA, piPC3, ZMIC1, Mv, MATS1e, MolMR, AATS7p, AATS3v, AATS6v, GATS1m, MWC3, TPC, MDEO.11, MDEC.33, nAtomP, AATS1v, AATS4v, AATS4m, AATS7v, AATS0v, nAcid.

Importance metric (from MolLogP (Gain=0.649127447) to nAcid (Gain=0.003849456)):

```
F2[1,as.numeric(c(xgb.importance(colnames(Fe2), model = model_xgboost)[,1])$Feature)]
```

#poredane varijable po važnosti u xgb modelu (gain-u)

|     | Feature | Gain        | Cover       | Frequency   |
|-----|---------|-------------|-------------|-------------|
| 1:  | 1       | 0.649127447 | 0.094215140 | 0.131493692 |
| 2:  | 2       | 0.043994918 | 0.059402130 | 0.058162137 |
| 3:  | 3       | 0.029777947 | 0.026362912 | 0.041925525 |
| 4:  | 5       | 0.017022725 | 0.043801608 | 0.049662690 |
| 5:  | 4       | 0.015159129 | 0.033720450 | 0.036398979 |
| 6:  | 11      | 0.014668722 | 0.059078591 | 0.041125129 |
| 7:  | 7       | 0.014226303 | 0.029095441 | 0.040172276 |
| 8:  | 10      | 0.013521849 | 0.051966279 | 0.046651675 |
| 9:  | 21      | 0.013183448 | 0.045232768 | 0.041048900 |
| 10: | 6       | 0.012572506 | 0.014527762 | 0.008918703 |
| 11: | 29      | 0.012407293 | 0.027277208 | 0.041849297 |
| 12: | 14      | 0.012243212 | 0.042115428 | 0.034531387 |
| 13: | 13      | 0.011358522 | 0.013187537 | 0.012958799 |
| 14: | 8       | 0.011234262 | 0.041757134 | 0.038990738 |
| 15: | 9       | 0.010915963 | 0.014014717 | 0.024126234 |
| 16: | 26      | 0.010547425 | 0.044385082 | 0.037885429 |
| 17: | 23      | 0.008575546 | 0.035416883 | 0.031215459 |
| 18: | 25      | 0.008389927 | 0.021781108 | 0.020086138 |
| 19: | 16      | 0.008185082 | 0.030303684 | 0.028585585 |
| 20: | 19      | 0.007987183 | 0.022106026 | 0.025231543 |
| 21: | 30      | 0.007739308 | 0.043629886 | 0.027175363 |
| 22: | 17      | 0.007435576 | 0.016949940 | 0.013492396 |
| 23: | 28      | 0.007414535 | 0.016261708 | 0.013682967 |
| 24: | 22      | 0.007179346 | 0.019670979 | 0.017456264 |
| 25: | 15      | 0.006929127 | 0.026282584 | 0.025917597 |
| 26: | 20      | 0.006659118 | 0.015445488 | 0.014140336 |
| 27: | 24      | 0.005981572 | 0.020555222 | 0.017189465 |
| 28: | 18      | 0.005619250 | 0.021833823 | 0.024393033 |
| 29: | 32      | 0.005584264 | 0.020525135 | 0.020695964 |
| 30: | 31      | 0.005262395 | 0.016570327 | 0.016160384 |
| 31: | 27      | 0.005246645 | 0.023469373 | 0.012539543 |
| 32: | 12      | 0.003849456 | 0.009057648 | 0.006136372 |

All selected variables for AqSolDB-n (data set (3)) sorted by variable's top-down importance are:  
MolLogP, ATS0p, XLogP, ZMIC1, GATS2c, piPC2, MPC7, AATS1i, MDEC-33, piPC3, AATS6v,  
TpiPC, nH, AATS5p, AATS1e, ATS1m, ZMIC2, TWC, piPC6, MPC8, AATS4v, MolMR, piPC1,  
piPC10, Mi, piPC4

Importance metric (from MolLogP (Gain=0.730166750) to piPC4 (Gain=0.002875328)):

F2[1,as.numeric(c(xgb.importance(colnames(Fe2), model = model\_xgboost)[,1])\$Feature)]

#poredane varijable po važnosti u xgb modelu (gain-u)

|     | Feature | Gain        | Cover       | Frequency   |
|-----|---------|-------------|-------------|-------------|
| 1:  | 1       | 0.730166750 | 0.071531492 | 0.127491166 |
| 2:  | 3       | 0.032449507 | 0.040030807 | 0.053851590 |
| 3:  | 2       | 0.032043385 | 0.090402646 | 0.075901060 |
| 4:  | 4       | 0.029045112 | 0.037983252 | 0.045371025 |
| 5:  | 19      | 0.015952347 | 0.078169430 | 0.086643110 |
| 6:  | 5       | 0.011825711 | 0.017753437 | 0.029964664 |
| 7:  | 7       | 0.011618177 | 0.017339910 | 0.023038869 |
| 8:  | 17      | 0.010922525 | 0.055408736 | 0.049469965 |
| 9:  | 6       | 0.010195707 | 0.038797398 | 0.036325088 |
| 10: | 9       | 0.010026923 | 0.020064883 | 0.021342756 |
| 11: | 15      | 0.009369433 | 0.036523719 | 0.040282686 |
| 12: | 14      | 0.009262002 | 0.034577514 | 0.019505300 |
| 13: | 23      | 0.008424132 | 0.026007714 | 0.023180212 |
| 14: | 12      | 0.008359439 | 0.060476230 | 0.050318021 |
| 15: | 20      | 0.008145935 | 0.069419399 | 0.050883392 |
| 16: | 24      | 0.007414872 | 0.041138006 | 0.034911661 |
| 17: | 10      | 0.007378082 | 0.068505338 | 0.048904594 |
| 18: | 22      | 0.006903413 | 0.019179506 | 0.019505300 |
| 19: | 11      | 0.006812002 | 0.025357545 | 0.024028269 |
| 20: | 26      | 0.005685699 | 0.008783018 | 0.012579505 |
| 21: | 21      | 0.005358526 | 0.030618177 | 0.036466431 |
| 22: | 13      | 0.005356312 | 0.029404847 | 0.023886926 |
| 23: | 8       | 0.005262050 | 0.016485129 | 0.011307420 |
| 24: | 18      | 0.004808029 | 0.013344718 | 0.009187279 |
| 25: | 25      | 0.004338605 | 0.037641436 | 0.031378092 |
| 26: | 16      | 0.002875328 | 0.015055714 | 0.014275618 |

All selected variables for Water (data set (4)) sorted by variable's top-down importance are: MolLogP, XLogP, CrippenLogP, CrippenMR, SpMax1\_Bhm, GGI5, ETA\_Eta\_F, MP (QM), AATS6v, MDEC.33, SpMax2\_Bhm, ALogp2, SpMax3\_Bhm, Mi, ETA\_EtaP\_F, ZMIC5, LipoaffinityIndex, GATS7v, MIC1, ATSC1m, AATS1i, minHBa, MDEO.12, AATSC2s, AATS2i, ETA\_Beta\_s, GGI9, piPC10, HOMO (QM), ATS6v, SsNH2, ZMIC2, piPC9.

Importance metric (from MolLogP (Gain=0.5957405562) to piPC9 (Gain=0.0008917595)):

```
> xgb.importance(colnames(Fe2), model = model_xgboost)
```

|     | Feature | Gain         | Cover       | Frequency |
|-----|---------|--------------|-------------|-----------|
| 1:  | 1       | 0.5957405562 | 0.041492850 | 0.0808    |
| 2:  | 2       | 0.0797850938 | 0.118110835 | 0.0832    |
| 3:  | 6       | 0.0368367821 | 0.027798840 | 0.0312    |
| 4:  | 3       | 0.0358869542 | 0.012664423 | 0.0292    |
| 5:  | 5       | 0.0309868099 | 0.014254450 | 0.0192    |
| 6:  | 4       | 0.0298700294 | 0.014731204 | 0.0292    |
| 7:  | 9       | 0.0217689134 | 0.010273043 | 0.0112    |
| 8:  | 13      | 0.0143036842 | 0.066380445 | 0.0692    |
| 9:  | 11      | 0.0132755837 | 0.015058339 | 0.0232    |
| 10: | 14      | 0.0119804803 | 0.021073560 | 0.0224    |
| 11: | 16      | 0.0109634784 | 0.027200361 | 0.0268    |
| 12: | 17      | 0.0108251695 | 0.045788712 | 0.0484    |
| 13: | 8       | 0.0086144576 | 0.010724438 | 0.0128    |
| 14: | 10      | 0.0084249320 | 0.041031311 | 0.0272    |
| 15: | 21      | 0.0082337719 | 0.038632323 | 0.0312    |
| 16: | 24      | 0.0068299606 | 0.042808996 | 0.0308    |
| 17: | 12      | 0.0066918660 | 0.047566397 | 0.0404    |
| 18: | 26      | 0.0064013159 | 0.011193585 | 0.0176    |
| 19: | 23      | 0.0057683168 | 0.018091309 | 0.0256    |
| 20: | 22      | 0.0057030912 | 0.025970436 | 0.0380    |
| 21: | 19      | 0.0056855997 | 0.018727826 | 0.0136    |
| 22: | 29      | 0.0055507291 | 0.041906206 | 0.0384    |
| 23: | 32      | 0.0054619625 | 0.024953529 | 0.0200    |
| 24: | 33      | 0.0051644279 | 0.069699974 | 0.0456    |
| 25: | 25      | 0.0045017347 | 0.034866471 | 0.0332    |
| 26: | 20      | 0.0041492324 | 0.007577352 | 0.0096    |
| 27: | 18      | 0.0038544550 | 0.024664433 | 0.0176    |
| 28: | 15      | 0.0035618200 | 0.006486903 | 0.0080    |
| 29: | 28      | 0.0035105811 | 0.063897772 | 0.0512    |
| 30: | 31      | 0.0033424438 | 0.024882523 | 0.0236    |
| 31: | 27      | 0.0031170037 | 0.014759100 | 0.0104    |
| 32: | 7       | 0.0023170034 | 0.014355887 | 0.0260    |
| 33: | 30      | 0.0008917595 | 0.002376164 | 0.0052    |



In the Ethanol model (data set (5)) (P+QMvars) sorted top-down descriptors (in importance) are: MP (QM), SpMAD\_Dt, SsOH, ALogp2, SpAbs\_Dzp, XLogP, SN1\_Dzi, BertzCT, Most\_neg (QM), GATS4e, SpMax\_Dt, MLFER\_L, SpMin6\_Bhp. SpMAD\_Dzp, AATSC3v, AATSC4i, nHsNH2, LUMO (QM), SpMax3\_Bhm, maxHBd, GATS2c, minHBint5, IC2, AATS7m, SpMax2\_Bhe, SpMax5\_Bhe\_ nBondsS3, GATS7cm SpMax4\_Bhm, WTPT.3, MATS1e, maxsOH, SpMax\_D.

Importance metric (from MP (Gain=0.195185733) to SpMax\_D (Gain=0.001676379)):

```
> xgb.importance(colnames(Fe2), model = model_xgboost)
```

|     | Feature | Gain        | Cover       | Frequency   |
|-----|---------|-------------|-------------|-------------|
| 1:  | 1       | 0.195185733 | 0.082503750 | 0.100326264 |
| 2:  | 2       | 0.077769877 | 0.021516130 | 0.032626427 |
| 3:  | 3       | 0.063826109 | 0.029010410 | 0.037520392 |
| 4:  | 6       | 0.043027343 | 0.058696607 | 0.069331158 |
| 5:  | 7       | 0.038916382 | 0.007803385 | 0.017128874 |
| 6:  | 9       | 0.034173458 | 0.028819492 | 0.024469821 |
| 7:  | 11      | 0.033669501 | 0.042620119 | 0.026916803 |
| 8:  | 4       | 0.033306260 | 0.016009819 | 0.026916803 |
| 9:  | 10      | 0.032266435 | 0.041165508 | 0.039967374 |
| 10: | 18      | 0.032096345 | 0.041192781 | 0.044861338 |
| 11: | 5       | 0.024625277 | 0.020119096 | 0.020391517 |
| 12: | 12      | 0.023587937 | 0.032422686 | 0.023654160 |
| 13: | 22      | 0.023577061 | 0.023685925 | 0.021207178 |
| 14: | 17      | 0.023559088 | 0.015303726 | 0.019575856 |
| 15: | 27      | 0.023085893 | 0.073248784 | 0.054649266 |
| 16: | 15      | 0.023084568 | 0.039101777 | 0.038336052 |
| 17: | 8       | 0.022555972 | 0.010679273 | 0.008972268 |
| 18: | 21      | 0.022022329 | 0.030522600 | 0.035889070 |
| 19: | 33      | 0.021597200 | 0.029410428 | 0.030995106 |
| 20: | 29      | 0.020454306 | 0.028646757 | 0.026916803 |
| 21: | 24      | 0.020111613 | 0.024852645 | 0.030995106 |
| 22: | 14      | 0.019454627 | 0.032486325 | 0.025285481 |
| 23: | 26      | 0.018518149 | 0.039344213 | 0.035889070 |
| 24: | 30      | 0.018384903 | 0.044632332 | 0.032626427 |
| 25: | 28      | 0.018171263 | 0.033234844 | 0.026101142 |
| 26: | 20      | 0.016409926 | 0.012236920 | 0.014681892 |
| 27: | 19      | 0.015389018 | 0.008330682 | 0.015497553 |
| 28: | 25      | 0.014826257 | 0.018009910 | 0.019575856 |
| 29: | 23      | 0.014073632 | 0.033728806 | 0.026101142 |
| 30: | 16      | 0.011040851 | 0.017658378 | 0.018760196 |
| 31: | 31      | 0.010882760 | 0.026089065 | 0.023654160 |
| 32: | 32      | 0.008673547 | 0.024664757 | 0.019575856 |
| 33: | 13      | 0.001676379 | 0.012252072 | 0.010603589 |

All selected variables for Acetone (data set (6)) sorted by variable's top-down importance are: MP (QM), MLFER\_L, MLFER\_E, GATS1v, AATSC2e, MATS3v, MDEN.22, MLFER\_BH, AATSC8p, GATS1p, ETA\_Eta\_L, MATS1p, TIC2, CIC1, GATS1m, ATSC2m, AATS7i, GATS4s, BCUTw.1l, MATS3p, ATS2m, Asp1 (QM), topoDiameter, nHBAcc, SHBint7, MLFER\_S, MATS2m, ATSC5m, GATS7v, Area3 (QM), SpMAD\_Dt.

Importance metric (from MP (Gain=0.252155261) to SpMAD\_Dt (Gain=0.002075200)):

|     | Feature | Gain        | Cover       | Frequency   |
|-----|---------|-------------|-------------|-------------|
| 1:  | 1       | 0.252155261 | 0.153537606 | 0.174142480 |
| 2:  | 2       | 0.073710469 | 0.021201671 | 0.029023747 |
| 3:  | 3       | 0.070871613 | 0.014679683 | 0.010554090 |
| 4:  | 4       | 0.053659427 | 0.009355823 | 0.029023747 |
| 5:  | 7       | 0.040549505 | 0.062063074 | 0.063324538 |
| 6:  | 13      | 0.039640065 | 0.045716429 | 0.036939314 |
| 7:  | 6       | 0.035333931 | 0.020805768 | 0.023746702 |
| 8:  | 5       | 0.034939810 | 0.023900066 | 0.018469657 |
| 9:  | 17      | 0.033812719 | 0.089088693 | 0.068601583 |
| 10: | 9       | 0.030806800 | 0.060739923 | 0.047493404 |
| 11: | 12      | 0.028912694 | 0.037381620 | 0.036939314 |
| 12: | 20      | 0.026480536 | 0.028619651 | 0.031662269 |
| 13: | 8       | 0.024659070 | 0.009574612 | 0.010554090 |
| 14: | 15      | 0.024467803 | 0.052790598 | 0.044854881 |
| 15: | 19      | 0.023159066 | 0.014002480 | 0.013192612 |
| 16: | 18      | 0.020957193 | 0.020045216 | 0.026385224 |
| 17: | 21      | 0.019359079 | 0.033589281 | 0.042216359 |
| 18: | 29      | 0.018382835 | 0.044747507 | 0.055408971 |
| 19: | 31      | 0.017508261 | 0.039757040 | 0.044854881 |
| 20: | 11      | 0.016760833 | 0.016596689 | 0.015831135 |
| 21: | 16      | 0.016717786 | 0.018399092 | 0.015831135 |
| 22: | 26      | 0.016445067 | 0.039767459 | 0.034300792 |
| 23: | 22      | 0.016231313 | 0.013627413 | 0.010554090 |
| 24: | 10      | 0.013237422 | 0.004573727 | 0.005277045 |
| 25: | 28      | 0.010916826 | 0.011564548 | 0.010554090 |
| 26: | 25      | 0.009674339 | 0.024639780 | 0.023746702 |
| 27: | 23      | 0.009090862 | 0.015044331 | 0.010554090 |
| 28: | 30      | 0.008104322 | 0.023618766 | 0.018469657 |
| 29: | 24      | 0.006958091 | 0.007657606 | 0.013192612 |
| 30: | 14      | 0.004421801 | 0.035422939 | 0.026385224 |
| 31: | 27      | 0.002075200 | 0.007490910 | 0.007915567 |

## Info Section S2: Detailed comments on Ref. [25 in main article] that studied curated AqSolDB

Ref. [25 in the main article] reports the most accurate model with RMSE=0.72 of the test set (335 in size) and RMSEV=0.76 of the validation set (335) among four final models (two linear and two non-linear) obtained using artificial neural networks for non-linear models. But, careful reading of the reference [25] reveals the following differences between our approach and the discussed study:

(1) Ref. [25] used 1674 compounds out of 1818 possible, not one-fragment 1619 compounds of HAC>3 as we considered. The reason they state is "*incapability of calculations of some Dragon descriptors*", although their most accurate model, NN-A, wasn't built on any Dragon descriptors, only on some available rdkit AqSolDB descriptors. The question is why 144 compounds were not included when they could be included. Also, careful inspection of the smiles in their supplementary data "cca3776\_Supplement.pdf" reveals ca. 20 compounds among 1674 compounds with HAC≤3, and smiles strings containing dots, meaning that not all compounds are one-fragment molecules. Also, our CV result is based on all 1399 training samples, while they used 335 of them as an optimizing test set.

(2) They separated the 1674 compounds into the training (1004), test (335, used for optimization), and final validation set (335). At the same time, they state in their paper that the models with the highest quality indicators (RMSE, R2, Q2F3, CCC) of the validation set were selected. However, the use of the external validation set's accuracy statistics for model selection makes that data set not a "final validation set", as its performance is then also used in model optimization as the other two data sets (training and test) were used in the optimization of the "best" model.

We cite these parts in their paper:

[QUOTE]

1. *"The most similar compounds that were located on the same neuron were then split in training, test and validation datasets."*

2. *The methodology applied in this work relies on division of the data into training, test and validation set of compounds. Here, we have to take care that the compounds in the validation set, which serves for the final validation of the models, is separated from the rest of compounds at very beginning, prior to any data curation. Then the test set is selected as described, and it serves for internal intermediate testing during the model development and optimization. This standard procedure has proven to be the most robust against potential overfitting.*

3. *The criteria used for selection of the best regression models were several validation parameters, which are RMSE, R2, Q2F3, CCC.[47–49] The models with the highest quality indicators of the validation set were selected.*

4. *During optimization process hundreds of models were generated, but only the best four models were selected and represented in this study (models NN-A, Q-A, NN-D, Q-D) for two sets of descriptors (A: AqSol 17 descriptors and D: Dragon Randić-like 94 descriptors) and two modelling*

*methods (NN for neural networks and Q for MLR). The QSARINS and CP-ANNatNIC software are well known and frequently used tools for linear and non-linear QSAR models.[43,45] The best models were chosen by using Root Mean Square Error for training set (RMSETR) and validation set (RMSEV) as the optimization value criteria.*  
[END of QUOTE]

Our comment: Given all the above at the same time, then there is no "final validation set" (i.e. no external test set), but three different data sets in optimization and selection of the model for each of the four methodologies. Besides, regarding point (1) above, that is making compound data sets mutually too similar, and since it didn't fall under AD rules, it should have been externally validated with an additional test set, but it wasn't. Otherwise, it is a question of how robust and applicable the models can be when used for extrapolation to external databases in which compounds do not fall within the same neuron.

(3) Their second-best model using the same artificial neural networks but on Dragon descriptors (instead of AquaSolDb descriptors) obtained RMSE of the test and validation set of 1.07 and 0.96, respectively. There is a prominent gap in the final result between their two best models (the top model has RMSE<sub>tot</sub> of 0.74 LogS, and the second 1.00 LogS) although they are both obtained with the same ANN method (just a slight difference in optimization criterion). Dragon descriptors are different variables, but well-known and explained [<https://vcclab.org/lab/edragon/>] [<https://doi.org/10.3389/fchem.2022.852893>]. This gap in performance between their two best models is hardly expected for a so large dataset, in our opinion, but the authors did not comment on it thoroughly. We obtained very similar RMSE<sub>tot</sub> between our XGB and FSTI-XGB on AquaSolDB data sets, although there is an extreme difference in the number of variables between XGB and FSTI-XGB. In addition, four different solubility models on 3664 water data sets also achieved a very close range of cross-validation RMSE statistics of 0.84-0.873 LogS [REF 41 in the main article]. We explained two objective reasons why AqSolDB-n obtained RMSE<sub>tot</sub> of 0.71 LogS and AqSolDB-w 0.97 LogS - they are two very different compound data sets. It is possible to obtain large differences in performance on the same data set with the same method, but different descriptors, although such a data set is either relatively small (our Methanol set had only 99 training and 36 test compounds (see Table 3)) or the used molecular descriptors for the less performing model should be weakly informative, which is unusual that it might be the case for 22 Dragon descriptors.

(4) The authors did not present %LogS $\pm$ 0.7 or %LogS $\pm$ 1.0 accuracy statistics in their results but put many correlation coefficient definitions in their article. We didn't have to use so many as our  $R^2$ (val) was already stronger than theirs, and as the accent of our paper is on %LogS $\pm$ 1.0, to compare results with Ref. [12] and later with results of CPs. If we use too many accuracy definitions in one subsection, that might potentially lead to confusion.

We did not want to put all these points and comments in the main article (especially not citations which cannot be all put like that in the main text).

### Info Section S3: Supporting Info Tables S2a-n: Conformal predictor results with FSTI-XGB and XGB models

**Table S2a.** CP efficiency results, i.e. prediction interval half-widths, on AqSolDB-w test set for FSTI-XGB model (32 vars. model)

| Method      | $\beta$                            | 99%          |              | 95%          |              | 90%          |              | 80%          |              | average of all 8 statistics | average of all means |
|-------------|------------------------------------|--------------|--------------|--------------|--------------|--------------|--------------|--------------|--------------|-----------------------------|----------------------|
|             |                                    | mean         | median       | mean         | median       | mean         | median       | mean         | median       |                             |                      |
| AR          | -                                  | 3.439        | 3.439        | 2.043        | 2.043        | 1.489        | 1.489        | 1.006        | 1.006        | 1.994                       | 1.994                |
| ARS         | 0                                  | 3.193        | 2.733        | 1.856        | 1.588        | 1.425        | 1.220        | 1.033        | 0.885        | 1.742                       | 1.877                |
| ARS         | 0.2                                | 2.906        | 2.720        | 1.751        | 1.639        | 1.350        | 1.264        | <b>0.959</b> | <b>0.898</b> | 1.686                       | 1.742                |
| ARS         | 0.5xQ2( $\sigma$ )                 | 2.905        | 2.612        | <b>1.717</b> | <b>1.544</b> | 1.364        | 1.226        | 0.977        | 0.879        | 1.653                       | 1.741                |
| ARS         | 1xQ2( $\sigma$ )                   | 2.869        | 2.647        | 1.730        | 1.596        | 1.355        | 1.250        | 0.964        | 0.889        | 1.663                       | 1.730                |
| ARS         | 2xQ2( $\sigma$ )                   | 2.947        | 2.791        | 1.768        | 1.674        | 1.362        | 1.290        | 0.960        | 0.909        | 1.713                       | 1.759                |
| ARS         | 6xQ2( $\sigma$ )                   | 3.111        | 3.039        | 1.863        | 1.820        | 1.422        | 1.389        | 0.967        | 0.944        | 1.819                       | 1.841                |
| ARS         | 1.0                                | 3.141        | 3.079        | 1.881        | 1.843        | 1.427        | 1.399        | 0.967        | 0.947        | 1.836                       | 1.854                |
| ARSS        | 0                                  | 3.182        | 2.723        | 1.886        | 1.614        | 1.463        | 1.252        | 1.051        | 0.899        | 1.759                       | 1.896                |
| ARSS        | 0.2                                | 2.904        | 2.719        | 1.760        | 1.648        | 1.383        | 1.295        | 0.988        | 0.925        | 1.703                       | 1.759                |
| ARSS        | 1.0                                | 3.125        | 3.063        | 1.918        | 1.880        | 1.441        | 1.413        | 1.003        | 0.983        | 1.853                       | 1.872                |
| ARSS        | 0.5xQ2( $\sigma$ )                 | 2.806        | 2.524        | 1.744        | 1.568        | 1.390        | 1.250        | 0.993        | 0.893        | 1.646                       | 1.733                |
| ARSS        | 1xQ2( $\sigma$ )                   | 2.882        | 2.658        | 1.745        | 1.610        | 1.386        | 1.278        | 0.987        | 0.911        | 1.682                       | 1.750                |
| ARSS        | 2xQ2( $\sigma$ )                   | 2.964        | 2.807        | 1.789        | 1.694        | 1.385        | 1.311        | 0.985        | 0.933        | 1.734                       | 1.781                |
| ARSS        | 6xQ2( $\sigma$ )                   | 3.122        | 3.049        | 1.895        | 1.851        | 1.438        | 1.404        | 0.996        | 0.972        | 1.841                       | 1.863                |
| EM-N        | 0                                  | 2.811        | 2.359        | 1.830        | 1.536        | 1.428        | 1.198        | 1.031        | 0.866        | 1.632                       | 1.775                |
| EM-N        | 0.2                                | 2.662        | 2.332        | 1.743        | 1.527        | 1.356        | 1.188        | 0.981        | 0.859        | 1.581                       | 1.686                |
| EM-N        | 1.0                                | 2.720        | 2.544        | 1.759        | 1.645        | 1.351        | 1.263        | 0.969        | 0.906        | 1.645                       | 1.700                |
| EM-N        | 0.5xQ2( $\sigma$ )                 | <b>2.657</b> | <b>2.355</b> | 1.735        | 1.537        | 1.350        | 1.196        | 0.971        | 0.860        | 1.583                       | 1.678                |
| EM-N        | 1xQ2( $\sigma$ )                   | 2.698        | 2.461        | 1.737        | 1.585        | 1.347        | 1.229        | 0.967        | 0.882        | 1.613                       | 1.687                |
| EM-N        | 2xQ2( $\sigma$ )                   | 2.732        | 2.567        | 1.769        | 1.662        | 1.358        | 1.276        | 0.969        | 0.910        | 1.655                       | 1.707                |
| EM-N        | 6xQ2( $\sigma$ )                   | 3.006        | 2.925        | 1.859        | 1.809        | 1.418        | 1.380        | 0.968        | 0.942        | 1.788                       | 1.813                |
| <b>EM-N</b> | <b>0.3xQ2(<math>\sigma</math>)</b> | 2.667        | 2.323        | <b>1.742</b> | <b>1.517</b> | <b>1.360</b> | <b>1.185</b> | <b>0.987</b> | <b>0.860</b> | <b>1.580</b>                | 1.689                |
| EM-Log      | 0                                  | 2.983        | 2.561        | 1.846        | 1.584        | 1.441        | 1.237        | 1.050        | 0.901        | 1.700                       | 1.830                |
| EM-Log      | 0.2                                | 2.745        | 2.478        | 1.759        | 1.587        | 1.345        | 1.214        | 0.982        | 0.886        | 1.625                       | 1.708                |
| EM-Log      | 1.0                                | 2.845        | 2.722        | 1.798        | 1.720        | 1.382        | 1.323        | 0.978        | 0.936        | 1.713                       | 1.751                |
| EM-Log      | 0.5xQ2( $\sigma$ )                 | 2.734        | 2.461        | 1.761        | 1.585        | 1.350        | 1.215        | 0.984        | 0.886        | 1.622                       | 1.707                |
| EM-Log      | 1xQ2( $\sigma$ )                   | 2.728        | 2.517        | 1.753        | 1.617        | <b>1.342</b> | <b>1.238</b> | 0.974        | 0.899        | 1.634                       | 1.699                |
| EM-Log      | 2xQ2( $\sigma$ )                   | 2.832        | 2.682        | 1.783        | 1.688        | 1.365        | 1.293        | 0.977        | 0.925        | 1.693                       | 1.739                |
| EM-Log      | 6xQ2( $\sigma$ )                   | 2.981        | 2.911        | 1.872        | 1.828        | 1.421        | 1.388        | 0.978        | 0.955        | 1.792                       | 1.813                |
| knn-EuD     | 0                                  | 3.454        | 2.815        | 2.167        | 1.766        | 1.633        | 1.331        | 1.125        | 0.917        | 1.901                       | 2.095                |
| knn-EuD     | 1xQ2( $\sigma$ )                   | 3.123        | 2.805        | 1.968        | 1.768        | 1.489        | 1.768        | 1.022        | 0.918        | 1.858                       | 1.901                |
| knn-EuD     | 2xQ2( $\sigma$ )                   | 3.090        | 2.873        | 1.934        | 1.799        | 1.461        | 1.358        | 1.006        | 0.935        | 1.807                       | 1.873                |
| knn-EuD     | 6xQ2( $\sigma$ )                   | 3.134        | 3.036        | 1.963        | 1.902        | 1.473        | 1.427        | 0.996        | 0.965        | 1.862                       | 1.892                |

\*Q2( $\sigma$ , ARS)=Q2( $\sigma$ , ARSS)=0.1370

\*\*Q2( $\sigma$ , EM-N)=0.5586

\*\*\*Q2( $\sigma$ , EM-log)=0.3774

\*\*\*\*Q2( $\sigma$ , kNN-EuD)=1.8687

**Table S2b.** CP error rate results, i.e. misclassification rates, on AqSolDB-w test set for FSTI-XGB model (32 vars. model)

|                                                  |        |        |        |        |
|--------------------------------------------------|--------|--------|--------|--------|
| Error rates                                      | 99.00% | 95.00% | 90.00% | 80.00% |
| AR                                               | 1.17%  | 4.70%  | 9.70%  | 20.02% |
| ARS b=0                                          | 0.62%  | 5.69%  | 10.32% | 19.84% |
| ARS b=0.2                                        | 1.05%  | 4.82%  | 10.20% | 20.27% |
| ARS b=0.5                                        | 1.24%  | 4.82%  | 9.52%  | 20.52% |
| ARS b=0.5xQ2( $\sigma$ )                         | 0.87%  | 5.50%  | 10.26% | 19.47% |
| ARS b=1xQ2( $\sigma$ )                           | 0.99%  | 5.25%  | 10.20% | 19.90% |
| ARS b=2xQ2( $\sigma$ )                           | 1.11%  | 5.01%  | 9.89%  | 20.64% |
| ARS b=6xQ2( $\sigma$ )                           | 1.17%  | 4.82%  | 9.58%  | 20.40% |
| ARS b=1.0                                        | 1.17%  | 4.82%  | 9.58%  | 20.77% |
| ARSS b=0                                         | 0.62%  | 5.39%  | 10.07% | 19.34% |
| ARSS b=0.2                                       | 1.05%  | 4.76%  | 9.70%  | 19.22% |
| ARSS b=0.5                                       | 1.24%  | 4.70%  | 9.27%  | 19.34% |
| ARSS b=1                                         | 1.17%  | 4.51%  | 9.33%  | 19.04% |
| ARSS b=0.5xQ2( $\sigma$ )                        | 1.11%  | 5.32%  | 9.64%  | 19.16% |
| ARSS b=1xQ2( $\sigma$ )                          | 0.99%  | 5.19%  | 9.70%  | 19.04% |
| ARSS b=2xQ2( $\sigma$ )                          | 0.99%  | 5.19%  | 9.70%  | 19.04% |
| ARSS b=6xQ2( $\sigma$ )                          | 1.05%  | 4.64%  | 9.21%  | 19.34% |
| EM-N b=0                                         | 1.17%  | 5.32%  | 10.51% | 20.02% |
| EM-N b=0.2                                       | 1.11%  | 5.07%  | 10.82% | 20.70% |
| EM-N b=0.5                                       | 0.93%  | 5.01%  | 10.14% | 19.96% |
| EM-N b=1.0                                       | 1.11%  | 5.19%  | 10.14% | 20.02% |
| EM-N b=0.5xQ2( $\sigma$ )                        | 1.11%  | 4.82%  | 10.51% | 20.21% |
| EM-N b=1xQ2( $\sigma$ )                          | 0.93%  | 5.13%  | 10.14% | 19.96% |
| EM-N b=2xQ2( $\sigma$ )                          | 1.24%  | 5.13%  | 10.07% | 19.96% |
| EM-N b=6xQ2( $\sigma$ )                          | 1.36%  | 5.01%  | 9.64%  | 20.70% |
| EM-N b=0.3xQ2( $\sigma$ )                        | 1.11%  | 5.13%  | 10.94% | 20.64% |
| EM-LOG b=0                                       | 1.05%  | 5.25%  | 9.64%  | 19.65% |
| EM-LOG b=0.2                                     | 1.17%  | 4.94%  | 10.32% | 20.21% |
| EM-LOG b=0.5                                     | 1.05%  | 5.01%  | 10.32% | 20.33% |
| EM-LOG b=1                                       | 1.17%  | 5.01%  | 10.26% | 20.27% |
| EM-LOG b=0.5xQ2( $\sigma$ )                      | 1.17%  | 4.94%  | 10.32% | 20.21% |
| EM-LOG b=1xQ2( $\sigma$ )                        | 1.05%  | 5.07%  | 10.51% | 20.09% |
| EM-LOG b=2xQ2( $\sigma$ )                        | 1.17%  | 5.13%  | 10.44% | 20.15% |
| EM-LOG b=6xQ2( $\sigma$ )                        | 1.30%  | 4.88%  | 9.77%  | 20.70% |
| kNN-EuD b=0                                      | 0.93%  | 4.82%  | 9.64%  | 20.46% |
| kNN-EuD b=1 x Q2( $\sigma$ )                     | 0.99%  | 4.76%  | 9.33%  | 20.46% |
| kNN-EuD b=2 x Q2( $\sigma$ )                     | 0.99%  | 4.88%  | 9.46%  | 20.40% |
| kNN-EuD b=6 x Q2( $\sigma$ )                     | 1.36%  | 4.45%  | 9.39%  | 20.33% |
| *Q2( $\sigma$ , ARS)=Q2( $\sigma$ , ARSS)=0.1370 |        |        |        |        |
| **Q2( $\sigma$ , EM-N)=0.5586                    |        |        |        |        |
| ***Q2( $\sigma$ , EM-log)=0.3774                 |        |        |        |        |
| ****Q2( $\sigma$ , kNN-EuD)=1.8687               |        |        |        |        |

**Table S2c.** CP efficiency results, i.e. prediction interval half-widths, on AqSolDB-w test set (1618) for XGB model (1146 vars. model)

| Method                        |                    | 99%          |              | 95%          |              | 90%          |              | 80%          |              | average of all | average of   |
|-------------------------------|--------------------|--------------|--------------|--------------|--------------|--------------|--------------|--------------|--------------|----------------|--------------|
|                               | $\beta$            | mean         | median       | mean         | median       | mean         | median       | mean         | median       | 8 statistics   | all means    |
| AR                            | -                  | 3.407        | 3.407        | 1.964        | 1.964        | 1.465        | 1.465        | 0.974        | 0.974        | 1.953          | 1.953        |
| ARSS                          | 0                  | 2.969        | 2.613        | 1.813        | 1.596        | 1.417        | 1.247        | 1.022        | 0.899        | 1.697          | 1.805        |
| ARSS                          | 0.2                | 2.806        | 2.641        | 1.752        | 1.649        | 1.350        | 1.271        | 0.966        | 0.909        | 1.668          | 1.719        |
| ARSS                          | 0.5                | 2.922        | 2.824        | 1.801        | 1.741        | 1.388        | 1.341        | 0.957        | 0.925        | 1.737          | 1.767        |
| ARSS                          | 1                  | 3.050        | 2.991        | 1.845        | 1.809        | 1.409        | 1.381        | 0.966        | 0.947        | 1.800          | 1.818        |
| EM-N                          | 0                  | 2.759        | 2.318        | 1.748        | 1.469        | 1.362        | 1.144        | 0.994        | 0.835        | 1.579          | 1.716        |
| <b>EM-N</b>                   | <b>0.2</b>         | <b>2.591</b> | <b>2.273</b> | <b>1.648</b> | <b>1.445</b> | <b>1.299</b> | <b>1.139</b> | <b>0.948</b> | <b>0.831</b> | <b>1.522</b>   | <b>1.622</b> |
| EM-N                          | 0.5                | 2.584        | 2.348        | 1.643        | 1.493        | 1.288        | 1.171        | 0.926        | 0.842        | 1.537          | 1.610        |
| EM-N                          | 1.0                | 2.645        | 2.476        | 1.673        | 1.567        | 1.304        | 1.221        | 0.924        | 0.865        | 1.584          | 1.637        |
| EM-N                          | 0.3xQ2( $\sigma$ ) | 2.601        | 2.268        | 1.665        | 1.451        | 1.305        | 1.138        | 0.953        | 0.830        | 1.526          | 1.631        |
| EM-N                          | 0.5xQ2( $\sigma$ ) | 2.610        | 2.314        | 1.633        | 1.448        | 1.291        | 1.145        | 0.939        | 0.833        | 1.527          | 1.618        |
| EM-N                          | 1.0xQ2( $\sigma$ ) | <b>2.595</b> | <b>2.367</b> | <b>1.644</b> | <b>1.500</b> | <b>1.284</b> | <b>1.171</b> | <b>0.928</b> | <b>0.846</b> | 1.542          | 1.613        |
| EM-EXP                        | 0                  | 2.985        | 2.245        | 1.873        | 1.408        | 1.456        | 1.095        | 1.053        | 0.792        | 1.613          | 1.842        |
| EM-EXP                        | 0.2                | 2.962        | 2.286        | 1.842        | 1.422        | 1.430        | 1.103        | 1.034        | 0.798        | 1.610          | 1.817        |
| EM-EXP                        | 0.5                | 2.879        | 2.291        | 1.811        | 1.441        | 1.411        | 1.123        | 1.018        | 0.810        | 1.598          | 1.780        |
| EM-EXP                        | 1.0                | 2.816        | 2.327        | 1.792        | 1.481        | 1.395        | 1.153        | 0.997        | 0.824        | 1.598          | 1.750        |
| Q2( $\sigma$ , ARSS)=0.1662   |                    |              |              |              |              |              |              |              |              |                |              |
| Q2( $\sigma$ , EM-N)=0.5461   |                    |              |              |              |              |              |              |              |              |                |              |
| Q2( $\sigma$ , EM-EXP)=1.7264 |                    |              |              |              |              |              |              |              |              |                |              |

**Table S2d.** CP error rate results, i.e. misclassification rates, on AqSolDB-w test set (1618) for XGB model (1146 vars. model)

| Error rates                                       | 99.00% | 95.00% | 90.00% | 80.00% |
|---------------------------------------------------|--------|--------|--------|--------|
| AR                                                | 0.80%  | 5.13%  | 9.70%  | 19.16% |
| ARSS b=0                                          | 0.93%  | 5.31%  | 9.33%  | 18.29% |
| ARSS b=0.2                                        | 0.74%  | 5.32%  | 9.64%  | 19.10% |
| ARSS b=0.5                                        | 0.80%  | 5.32%  | 9.64%  | 19.16% |
| ARSS b=1                                          | 0.80%  | 5.19%  | 9.77%  | 18.79% |
| EM-N b=0                                          | 1.17%  | 6.37%* | 10.69% | 20.02% |
| <i>EM-N b=0.2 (0.366xQ2(<math>\sigma</math>))</i> | 0.87%  | 6.24%  | 11.06% | 19.96% |
| EM-N b=0.5                                        | 0.74%  | 6.18%  | 10.82% | 19.84% |
| EM-N b=1.0                                        | 0.87%  | 6.12%  | 10.38% | 19.90% |
| EM-N b=0.3*Q2( $\sigma$ )**                       | 0.99%  | 6.30%  | 11.19  | 20.21% |
| EM-N b=0.5*Q2( $\sigma$ )                         | 0.80%  | 6.30%  | 10.94% | 19.96% |
| EM-N b=1*Q2( $\sigma$ )                           | 0.74%  | 6.30%  | 11.00% | 19.72% |
| EM-EXP-Lev b=0***                                 | 0.80%  | 5.81%  | 10.82% | 19.96% |
| EM-EXP-Lev b=0.2                                  | 0.93%  | 5.87%  | 11.00% | 19.96% |
| EM-EXP-Lev b=0.5                                  | 1.05%  | 6.00%  | 11.06% | 20.21% |
| EM-EXP-Lev b=1.0                                  | 1.05%  | 5.93%  | 10.57% | 20.27% |
| Q2( $\sigma$ , ARSS)=0.1662                       |        |        |        |        |
| Q2( $\sigma$ , EM-N)=0.5461                       |        |        |        |        |
| Q2( $\sigma$ , EM-EXP)=1.7264                     |        |        |        |        |

**Table S2e.** CP efficiency results, i.e. prediction interval half-widhts, on AqSolDB-n internal test set (220), FSTI-XGB model

| Method      | $\beta$                          | 99%          |              | 95%          |              | 90%          |              | 80%          |              | average of all 8 statistics | average of all means |
|-------------|----------------------------------|--------------|--------------|--------------|--------------|--------------|--------------|--------------|--------------|-----------------------------|----------------------|
|             |                                  | mean         | median       | mean         | median       | mean         | median       | mean         | median       |                             |                      |
| AR          | -                                | 2.335        | 2.335        | 1.534        | 1.534        | 1.176        | 1.176        | 0.783        | 0.783        | 1.457                       | 1.457                |
| ARSS        | 0                                | 2.197        | 2.031        | 1.386        | 1.281        | 1.070        | 0.989        | 0.803        | 0.742        | 1.312                       | 1.364                |
| ARSS        | 0.2                              | 2.018        | 1.955        | 1.328        | 1.286        | 1.069        | 1.035        | 0.754        | 0.731        | 1.272                       | 1.292                |
| ARSS        | 0.5                              | 2.077        | 2.041        | 1.392        | 1.368        | 1.085        | 1.066        | 0.766        | 0.753        | 1.319                       | 1.330                |
| ARSS        | 0.3xQ2( $\sigma$ )               | 1.998        | 1.881        | 1.329        | 1.251        | 1.059        | 0.996        | 0.786        | 0.740        | 1.255                       | 1.293                |
| ARSS        | 0.5xQ2( $\sigma$ )               | 1.960        | 1.859        | 1.322        | 1.254        | 1.038        | 0.985        | 0.777        | 0.737        | 1.242                       | 1.274                |
| ARSS        | 1xQ2( $\sigma$ )                 | 1.979        | 1.902        | 1.321        | 1.270        | 1.042        | 1.002        | 0.759        | 0.729        | 1.251                       | 1.275                |
| ARSS        | 1.5xQ2( $\sigma$ )               | 2.017        | 1.954        | 1.329        | 1.288        | 1.070        | 1.037        | <b>0.755</b> | <b>0.731</b> | 1.273                       | 1.293                |
| ARSS        | 2xQ2( $\sigma$ )                 | 1.994        | 1.942        | 1.346        | 1.311        | 1.088        | 1.060        | 0.757        | 0.737        | 1.279                       | 1.296                |
| ARSS        | 3xQ2( $\sigma$ )                 | 2.034        | 1.994        | 1.381        | 1.354        | 1.092        | 1.071        | 0.765        | 0.750        | 1.305                       | 1.318                |
| ARSS        | 1.0                              | 2.12         | 2.100        | 1.440        | 1.427        | 1.109        | 1.098        | 0.772        | 0.765        | 1.354                       | 1.360                |
| ARS         | 0                                | 2.200        | 2.034        | 1.383        | 1.280        | 1.079        | 0.997        | 0.809        | 0.748        | 1.316                       | 1.368                |
| ARS         | 0.2                              | 2.023        | 1.959        | 1.305        | 1.264        | 1.040        | 1.007        | 0.764        | 0.740        | 1.263                       | 1.283                |
| ARS         | 0.5                              | 2.108        | 2.072        | 1.368        | 1.345        | 1.073        | 1.055        | 0.780        | 0.767        | 1.321                       | 1.332                |
| ARS         | 0.3xQ2( $\sigma$ )               | 2.011        | 1.892        | 1.333        | 1.254        | 1.061        | 0.999        | 0.774        | 0.728        | 1.257                       | 1.295                |
| ARS         | 0.5xQ2( $\sigma$ )               | 1.952        | 1.852        | 1.287        | 1.221        | 1.043        | 0.989        | 0.771        | 0.731        | 1.231                       | 1.263                |
| ARS         | 1xQ2( $\sigma$ )                 | 2.035        | 1.956        | 1.293        | 1.242        | 1.035        | 0.995        | 0.761        | 0.732        | 1.256                       | 1.281                |
| ARS         | 1.5xQ2( $\sigma$ )               | 2.022        | 1.959        | 1.305        | 1.264        | 1.038        | 1.006        | 0.765        | 0.741        | 1.263                       | 1.283                |
| ARS         | 2xQ2( $\sigma$ )                 | 1.999        | 1.947        | 1.342        | 1.306        | 1.048        | 1.020        | 0.774        | 0.754        | 1.274                       | 1.291                |
| ARS         | 3xQ2( $\sigma$ )                 | 2.053        | 2.012        | 1.356        | 1.329        | 1.069        | 1.047        | 0.776        | 0.761        | 1.300                       | 1.314                |
| ARS         | 1.0                              | 2.166        | 2.146        | 1.414        | 1.401        | 1.097        | 1.086        | 0.776        | 0.768        | 1.357                       | 1.363                |
| EM-N        | 0                                | 2.185        | 2.016        | 1.352        | 1.248        | 1.095        | 1.011        | 0.825        | 0.761        | 1.312                       | 1.364                |
| EM-N        | 0.2                              | 1.939        | 1.832        | 1.284        | 1.213        | 1.050        | 0.992        | 0.772        | 0.729        | 1.226                       | 1.261                |
| EM-N        | 0.5                              | 1.840        | 1.768        | 1.296        | 1.245        | 1.039        | 0.999        | 0.755        | 0.726        | 1.209                       | 1.233                |
| EM-N        | 1.0                              | 1.930        | 1.880        | 1.345        | 1.310        | 1.059        | 1.031        | 0.762        | 0.742        | 1.257                       | 1.274                |
| EM-N        | 0.5xQ2( $\sigma$ )               | 1.905        | 1.804        | <b>1.267</b> | <b>1.199</b> | 1.047        | 0.992        | 0.763        | 0.723        | 1.213                       | 1.246                |
| <b>EM-N</b> | <b>1xQ2(<math>\sigma</math>)</b> | <b>1.831</b> | <b>1.757</b> | 1.285        | 1.233        | <b>1.034</b> | <b>0.992</b> | 0.758        | 0.727        | 1.202                       | 1.227                |
| EM-N        | 1.5xQ2( $\sigma$ )               | 1.883        | 1.822        | 1.318        | 1.275        | 1.042        | 1.008        | 0.762        | 0.737        | 1.231                       | 1.251                |
| EM-N        | 2xQ2( $\sigma$ )                 | 1.924        | 1.872        | 1.336        | 1.299        | 1.054        | 1.025        | 0.765        | 0.744        | 1.252                       | 1.270                |
| EM-N        | 3xQ2( $\sigma$ )                 | 1.976        | 1.935        | 1.376        | 1.347        | 1.046        | 1.025        | 0.761        | 0.745        | 1.276                       | 1.290                |
| EM-N        | 6xQ2( $\sigma$ )                 | 2.036        | 2.012        | 1.426        | 1.409        | 1.084        | 1.071        | 0.777        | 0.768        | 1.323                       | 1.331                |
| EM-N        | 0.3xQ2( $\sigma$ )               | 1.954        | 1.836        | 1.303        | 1.225        | 1.047        | 0.984        | 0.782        | 0.735        | 1.233                       | 1.272                |
| EM-Log      | 0                                | 2.302        | 2.065        | 1.441        | 1.292        | 1.171        | 1.050        | 0.859        | 0.770        | 1.369                       | 1.443                |
| EM-Log      | 0.2                              | 1.865        | 1.740        | 1.352        | 1.262        | 1.089        | 1.016        | 0.785        | 0.733        | 1.230                       | 1.273                |
| EM-Log      | 0.5                              | 1.915        | 1.830        | 1.367        | 1.307        | 1.060        | 1.013        | 0.766        | 0.732        | 1.249                       | 1.277                |
| EM-Log      | 1.0                              | 1.985        | 1.930        | 1.409        | 1.370        | 1.084        | 1.053        | 0.775        | 0.753        | 1.295                       | 1.313                |
| EM-Log      | 0.5xQ2( $\sigma$ )               | 1.911        | 1.774        | 1.357        | 1.260        | 1.090        | 1.012        | 0.797        | 0.740        | 1.243                       | 1.289                |
| EM-Log      | 1xQ2( $\sigma$ )                 | 1.916        | 1.811        | 1.345        | 1.271        | 1.063        | 1.004        | 0.775        | 0.733        | 1.240                       | 1.275                |
| EM-Log      | 1.5xQ2( $\sigma$ )               | 1.915        | 1.830        | 1.365        | 1.304        | 1.062        | 1.015        | 0.767        | 0.733        | 1.249                       | 1.277                |
| EM-Log      | 2xQ2( $\sigma$ )                 | 1.920        | 1.848        | 1.375        | 1.324        | 1.059        | 1.020        | 0.774        | 0.745        | 1.258                       | 1.282                |
| EM-Log      | 3xQ2( $\sigma$ )                 | 1.982        | 1.926        | 1.409        | 1.370        | 1.086        | 1.055        | 0.776        | 0.754        | 1.295                       | 1.313                |
| EM-Log      | 6xQ2( $\sigma$ )                 | 2.059        | 2.025        | 1.433        | 1.410        | 1.099        | 1.081        | 0.777        | 0.764        | 1.331                       | 1.342                |

Q2( $\sigma$ , ARS)=Q2( $\sigma$ , ARSS)=0.1350

Q2( $\sigma$ , EM-N)=0.4651

Q2( $\sigma$ , EM-LOG)=0.3275



**Table S2f** CP error rate results, i.e. misclassification rates, on Water internal test set (220), FSTI-XGB model

| Error rates                                     | 99.00% | 95.00% | 90.00% | 80.00% |
|-------------------------------------------------|--------|--------|--------|--------|
| AR                                              | 0%     | 2.27%  | 4.54%  | 20%    |
| ARS b=0                                         | 0%     | 2.73%  | 4.55%  | 20%    |
| ARS b=0.2                                       | 0%     | 1.36%  | 5.45%  | 17.27% |
| ARS b=0.5                                       | 0%     | 2.27%  | 4.55%  | 18.18% |
| ARS b=0.3xQ2( $\sigma$ )                        | 0%     | 1.82%  | 4.09%  | 17.73% |
| ARS b=0.5xQ2( $\sigma$ )                        | 0%     | 1.36%  | 4.55%  | 17.27% |
| ARS b=1xQ2( $\sigma$ )                          | 0%     | 1.82%  | 5.91%  | 18.18% |
| ARS b=1.5xQ2( $\sigma$ )                        | 0%     | 1.36%  | 5.45%  | 17.27% |
| ARS b=2xQ2( $\sigma$ )                          | 0%     | 1.36%  | 5.45%  | 17.27% |
| ARS b=3xQ2( $\sigma$ )                          | 0%     | 1.36%  | 4.55%  | 18.64% |
| ARS b=1.0                                       | 0%     | 2.27%  | 5%     | 20%    |
| ARSS b=0                                        | 0%     | 1.82%  | 4.55%  | 16.36% |
| ARSS b=0.2                                      | 0%     | 1.36%  | 4.55%  | 18.18% |
| ARSS b=0.5                                      | 0%     | 1.82%  | 4.55%  | 19.55% |
| ARSS b=1                                        | 0%     | 2.27%  | 5%     | 20%    |
| ARSS b=0.3xQ2( $\sigma$ )                       | 0%     | 1.82%  | 4.09%  | 17.27% |
| ARSS b=0.5xQ2( $\sigma$ )                       | 0%     | 1.36%  | 5.45%  | 18.64% |
| ARSS b=1xQ2( $\sigma$ )                         | 0%     | 1.36%  | 5.45%  | 18.64% |
| ARSS b=1.5xQ2( $\sigma$ )                       | 0%     | 1.36%  | 4.55%  | 18.18% |
| ARSS b=2xQ2( $\sigma$ )                         | 0%     | 1.36%  | 5%     | 19.09% |
| ARSS b=3xQ2( $\sigma$ )                         | 0%     | 1.36%  | 4.55%  | 18.64% |
| EM-N b=0                                        | 0.45%  | 4.09%  | 10.45% | 19.09% |
| EM-N b=0.2                                      | 0%     | 4.09%  | 9.09%  | 15.91% |
| EM-N b=0.5                                      | 0%     | 4.55%  | 7.27%  | 17.27% |
| EM-N b=1.0                                      | 0%     | 3.18%  | 6.82%  | 16.82% |
| EM-N b=0.5xQ2( $\sigma$ )                       | 0%     | 5%     | 9.09%  | 15.91% |
| EM-N b=1xQ2( $\sigma$ )                         | 0%     | 4.55%  | 7.27%  | 17.27% |
| EM-N b=1.5xQ2( $\sigma$ )                       | 0%     | 3.18%  | 6.82%  | 16.82% |
| EM-N b=2xQ2( $\sigma$ )                         | 0%     | 3.18%  | 6.82%  | 16.82% |
| EM-N b=3xQ2( $\sigma$ )                         | 0%     | 3.18%  | 6.36%  | 18.18% |
| EM-N b=6xQ2( $\sigma$ )                         | 0%     | 2.73%  | 5.91%  | 19.09% |
| EM-N b=0.3xQ2( $\sigma$ )                       | 0.45%  | 4.09%  | 9.55%  | 15.91% |
| EM-LOG b=0                                      | 0.91%  | 3.64%  | 9.09%  | 17.27% |
| EM-LOG b=0.2                                    | 0.45%  | 3.64%  | 7.73%  | 15.91% |
| EM-LOG b=0.5                                    | 0.45%  | 3.18%  | 6.36%  | 16.81% |
| EM-LOG b=1                                      | 0%     | 3.18%  | 6.36%  | 17.73% |
| EM-LOG b=0.5xQ2( $\sigma$ )                     | 0.45%  | 3.64%  | 8.64%  | 15.45% |
| EM-LOG b=1xQ2( $\sigma$ )                       | 0.45%  | 3.64%  | 6.81%  | 16.36% |
| EM-LOG b=1.5xQ2( $\sigma$ )                     | 0.45%  | 3.18%  | 6.36%  | 16.36% |
| EM-LOG b=2xQ2( $\sigma$ )                       | 0.45%  | 3.18%  | 6.36%  | 16.36% |
| EM-LOG b=3xQ2( $\sigma$ )                       | 0%     | 3.18%  | 6.36%  | 17.73% |
| EM-LOG b=6xQ2( $\sigma$ )                       | 0%     | 3.18%  | 5.91%  | 18.18% |
| Q2( $\sigma$ , ARS)=Q2( $\sigma$ , ARSS)=0.1350 |        |        |        |        |
| Q2( $\sigma$ , EM-N)=0.4651                     |        |        |        |        |
| Q2( $\sigma$ , EM-LOG)=0.3275                   |        |        |        |        |

**Table S2g.** CP efficiency results, i.e. prediction interval half-widths, on Water-900 external test set (900) of AqSolDB-n CPs, FSTI-XGB model

| Method      |                                    | 99%          |              | 95%          |              | 90%          |              | 80%          |              | average of all | average of   |
|-------------|------------------------------------|--------------|--------------|--------------|--------------|--------------|--------------|--------------|--------------|----------------|--------------|
|             | $\beta$                            | mean         | median       | mean         | median       | mean         | median       | mean         | median       | 8 statistics   | all means    |
| AR          | -                                  | 2.335        | 2.335        | 1.534        | 1.534        | 1.176        | 1.176        | 0.783        | 0.783        | 1.457          | 1.457        |
| ARS         | 0                                  | 2.172        | 2.078        | 1.366        | 1.307        | 1.065        | 1.019        | 0.799        | 0.764        | 1.321          | 1.351        |
| ARS         | 0.2                                | 2.012        | 1.976        | 1.298        | 1.275        | 1.035        | 1.016        | 0.760        | 0.747        | 1.265          | 1.276        |
| ARS         | 0.5                                | 2.102        | 2.082        | 1.364        | 1.351        | 1.070        | 1.060        | 0.778        | 0.771        | 1.322          | 1.329        |
| ARS         | 0.3xQ2( $\sigma$ )                 | 1.991        | 1.924        | 1.319        | 1.275        | 1.051        | 1.015        | 0.766        | 0.740        | 1.259          | 1.282        |
| <b>ARS</b>  | <b>0.5xQ2(<math>\sigma</math>)</b> | <b>1.935</b> | <b>1.878</b> | <b>1.276</b> | <b>1.238</b> | <b>1.033</b> | <b>1.003</b> | <b>0.764</b> | <b>0.742</b> | <b>1.234</b>   | <b>1.252</b> |
| ARS         | 1xQ2( $\sigma$ )                   | 2.021        | 1.76         | 1.284        | 1.256        | 1.028        | 1.006        | 0.756        | 0.740        | 1.253          | 1.272        |
| ARS         | 1.5xQ2( $\sigma$ )                 | 2.011        | 1.975        | 1.298        | 1.274        | 1.033        | 1.014        | 0.761        | 0.748        | 1.275          | 1.276        |
| ARS         | 2xQ2( $\sigma$ )                   | 1.990        | 1.960        | 1.336        | 1.316        | 1.043        | 1.027        | 0.770        | 0.759        | 1.273          | 1.285        |
| ARS         | 3xQ2( $\sigma$ )                   | 2.046        | 2.022        | 1.351        | 1.336        | 1.065        | 1.053        | 0.774        | 0.765        | 1.306          | 1.309        |
| ARS         | 1.0                                | 2.117        | 2.105        | 1.438        | 1.430        | 1.107        | 1.101        | 0.771        | 0.767        | 1.355          | 1.358        |
| ARSS        | 0                                  | 2.169        | 2.075        | 1.368        | 1.309        | 1.056        | 1.010        | 0.793        | 0.758        | 1.317          | 1.347        |
| ARSS        | 0.2                                | 2.007        | 1.971        | 1.321        | 1.297        | 1.064        | 1.044        | 0.750        | 0.737        | 1.274          | 1.286        |
| ARSS        | 0.5                                | 2.071        | 2.051        | 1.388        | 1.374        | 1.082        | 1.071        | 0.764        | 0.756        | 1.320          | 1.326        |
| ARSS        | 1.0                                | 2.117        | 2.105        | 1.438        | 1.430        | 1.107        | 1.101        | 0.771        | 0.767        | 1.355          | 1.358        |
| <b>ARSS</b> | <b>0.5xQ2(<math>\sigma</math>)</b> | 1.943        | 1.886        | 1.310        | 1.271        | <b>1.029</b> | <b>0.999</b> | 0.770        | 0.748        | 1.245          | 1.263        |
| ARSS        | 0.3xQ2( $\sigma$ )                 | 1.978        | 1.911        | 1.316        | 1.272        | 1.048        | 1.013        | 0.778        | 0.752        | 1.259          | 1.280        |
| ARSS        | 1xQ2( $\sigma$ )                   | 1.966        | 1.922        | 1.312        | 1.283        | 1.036        | 1.013        | 0.754        | 0.737        | 1.253          | 1.267        |
| ARSS        | 1.5xQ2( $\sigma$ )                 | 2.006        | 1.971        | 1.322        | 1.298        | 1.065        | 1.046        | <b>0.751</b> | <b>0.738</b> | 1.275          | 1.286        |
| ARSS        | 2xQ2( $\sigma$ )                   | 1.985        | 1.956        | 1.340        | 1.320        | 1.083        | 1.067        | 0.753        | 0.742        | 1.281          | 1.290        |
| ARSS        | 3xQ2( $\sigma$ )                   | 2.027        | 2.004        | 1.377        | 1.361        | 1.089        | 1.076        | 0.763        | 0.754        | 1.306          | 1.314        |
| EM-N        | 0                                  | 2.345        | 2.127        | 1.451        | 1.316        | 1.175        | 1.067        | 0.885        | 0.803        | 1.396          | 1.464        |
| EM-N*       | 0.2                                | 2.041        | 1.903        | 1.351        | 1.259        | 1.105        | 1.030        | 0.813        | 0.757        | 1.282          | 1.328        |
| EM-N*       | 0.5                                | 1.908        | 1.816        | 1.344        | 1.279        | 1.078        | 1.025        | 0.783        | 0.745        | 1.247          | 1.278        |
| EM-N        | 1.0                                | 1.978        | 1.913        | 1.379        | 1.333        | 1.085        | 1.049        | 0.781        | 0.755        | 1.284          | 1.306        |
| EM-N*       | 0.5xQ2( $\sigma$ )                 | 2.001        | 1.871        | 1.330        | 1.244        | 1.100        | 1.028        | 0.802        | 0.750        | 1.266          | 1.308        |
| EM-N*       | 1xQ2( $\sigma$ )                   | 1.901        | 1.805        | 1.334        | 1.267        | 1.074        | 1.020        | 0.787        | 0.747        | 1.242          | 1.274        |
| EM-N*       | 1.5xQ2( $\sigma$ )                 | 1.942        | 1.863        | 1.359        | 1.303        | 1.075        | 1.031        | 0.785        | 0.753        | 1.264          | 1.290        |
| EM-N*       | 2xQ2( $\sigma$ )                   | 1.974        | 1.906        | 1.370        | 1.323        | 1.081        | 1.044        | 0.785        | 0.758        | 1.280          | 1.303        |
| EM-N*       | 3xQ2( $\sigma$ )                   | 2.015        | 1.962        | 1.403        | 1.366        | 1.067        | 1.039        | 0.776        | 0.756        | 1.298          | 1.315        |
| EM-N        | 6xQ2( $\sigma$ )                   | 2.059        | 2.028        | 1.442        | 1.420        | 1.097        | 1.080        | 0.786        | 0.774        | 1.336          | 1.346        |
| EM-N*       | 0.3xQ2( $\sigma$ )                 | 2.067        | 1.914        | 1.379        | 1.277        | 1.108        | 1.026        | 0.827        | 0.766        | 1.296          | 1.345        |
| EM-Log      | 0                                  | 2.613        | 2.332        | 1.635        | 1.459        | 1.329        | 1.186        | 0.975        | 0.870        | 1.550          | 1.638        |
| EM-Log*     | 0.2                                | 2.029        | 1.881        | 1.471        | 1.363        | 1.185        | 1.098        | 0.854        | 0.792        | 1.334          | 1.385        |
| EM-Log*     | 0.5                                | 2.025        | 1.925        | 1.445        | 1.374        | 1.121        | 1.065        | 0.810        | 0.770        | 1.317          | 1.350        |
| EM-Log      | 1.0                                | 2.058        | 1.992        | 1.460        | 1.414        | 1.123        | 1.087        | 0.803        | 0.777        | 1.339          | 1.361        |
| EM-Log*     | 0.5xQ2( $\sigma$ )                 | 2.090        | 1.928        | 1.484        | 1.369        | 1.192        | 1.099        | 0.871        | 0.804        | 1.355          | 1.409        |
| EM-Log*     | 1xQ2( $\sigma$ )                   | 2.053        | 1.929        | 1.441        | 1.354        | 1.139        | 1.070        | 0.831        | 0.780        | 1.325          | 1.366        |
| EM-Log*     | 1.5xQ2( $\sigma$ )                 | 2.026        | 1.925        | 1.444        | 1.372        | 1.123        | 1.067        | 0.811        | 0.771        | 1.317          | 1.351        |
| EM-Log*     | 2xQ2( $\sigma$ )                   | 2.013        | 1.929        | 1.443        | 1.382        | 1.111        | 1.064        | 0.812        | 0.778        | 1.317          | 1.345        |
| EM-Log*     | 3xQ2( $\sigma$ )                   | 2.055        | 1.989        | 1.462        | 1.414        | 1.126        | 1.090        | 0.805        | 0.779        | 1.340          | 1.362        |
| EM-Log      | 6xQ2( $\sigma$ )                   | 2.104        | 2.064        | 1.464        | 1.436        | 1.123        | 1.101        | 0.794        | 0.779        | 1.358          | 1.371        |

Q2( $\sigma$ , ARS)=Q2( $\sigma$ , ARSS)=0.1350  
Q2( $\sigma$ , EM-N)=0.4651  
Q2( $\sigma$ , EM-LOG)=0.3275

\* The methodology did not pass the error rate validation (i.e. misclassification rate was too high above significance margin), t-test,  $p < 0.01$ .

**Table S2h** CP error rate results, i.e. misclassification rates, on Water-900 external test set (900) of AqSolDB-n CPs, FSTI-XGB model

|                                           |        |        |               |        |
|-------------------------------------------|--------|--------|---------------|--------|
| Error rates                               | 99.00% | 95.00% | 90.00%        | 80.00% |
| AR                                        | 1.44%  | 6.11%  | 10.67%        | 21.78% |
| ARS b=0                                   | 1.78%  | 7.44%  | 12.22%        | 18.56% |
| ARS b=0.2                                 | 1.78%  | 7.33%  | 12.11%        | 20.56% |
| ARS b=0.5                                 | 1.78%  | 7.56%  | 12.11%        | 20.78% |
| ARS b=0.3xQ2( $\sigma$ )                  | 1.89%  | 7.22%  | 11.89%        | 20.22% |
| ARS b=0.5xQ2( $\sigma$ )                  | 2.33%  | 7.44%  | 12.33%        | 20.22% |
| ARS b=1xQ2( $\sigma$ )                    | 1.78%  | 7.22%  | 12.11%        | 20.89% |
| ARS b=1.5xQ2( $\sigma$ )                  | 1.78%  | 7.44%  | 12.11%        | 20.56% |
| ARS b=2xQ2( $\sigma$ )                    | 2.33%  | 7.22%  | 12.33%        | 20.56% |
| ARS b=3xQ2( $\sigma$ )                    | 2%     | 7.44%  | 11.89%        | 20.89% |
| ARS b=1.0                                 | 1.78%  | 7.56%  | 12.11%        | 20.78% |
| ARSS b=0                                  | 1.78%  | 7.44%  | 12.22%        | 19.00% |
| ARSS b=0.2                                | 1.89%  | 7.11%  | 11.22%        | 20.78% |
| ARSS b=0.5                                | 2.00%  | 7.22%  | 11.89%        | 21.22% |
| ARSS b=1                                  | 2%     | 7.11%  | 11.44%        | 21.56% |
| ARSS b=0.3xQ2( $\sigma$ )                 | 2%     | 7.22%  | 11.89%        | 20.22% |
| <b>ARSS b=0.5xQ2(<math>\sigma</math>)</b> | 2.22%  | 7.22%  | <b>12.67%</b> | 20.22% |
| ARSS b=1xQ2( $\sigma$ )                   | 2.11%  | 7.11%  | 11.89%        | 20.89% |
| ARSS b=1.5xQ2( $\sigma$ )                 | 1.89%  | 7.11%  | 11.22%        | 20.78% |
| ARSS b=2xQ2( $\sigma$ )                   | 2.33%  | 7.11%  | 11.22%        | 21.11% |
| ARSS b=3xQ2( $\sigma$ )                   | 2%     | 7.11%  | 11.89%        | 21.22% |
| EM-N b=0                                  | 1.78%  | 7.67%  | 11.22%        | 18.11% |
| EM-N b=0.2                                | 2.22%  | *8.44% | 11.67%        | 20.22% |
| EM-N b=0.5                                | *2.56% | *8.11% | 11.78%        | 22%    |
| EM-N b=1.0                                | 2.22%  | 7.33%  | 11.89%        | 22%    |
| EM-N b=0.5xQ2( $\sigma$ )                 | 2.44%  | *8.56% | 11.67%        | 20.67% |
| EM-N b=1xQ2( $\sigma$ )                   | *2.67% | *8.33% | 12%           | 21.89% |
| EM-N b=1.5xQ2( $\sigma$ )                 | 2.33%  | *8.22% | 11.78%        | 22.22% |
| EM-N b=2xQ2( $\sigma$ )                   | 2.22%  | 7.56%  | 12%           | 22%    |
| EM-N b=3xQ2( $\sigma$ )                   | 2.33%  | 7.11%  | 12.67%        | 22.11% |
| EM-N b=6xQ2( $\sigma$ )                   | 2.22%  | 6.67%  | 12.56%        | 21.33% |
| EM-N b=0.3xQ2( $\sigma$ )                 | 2.33%  | *8.22% | 11.33%        | 19.89% |
| EM-LOG b=0                                | 1.67%  | 7.56%  | 12.33%        | 17.89% |
| EM-LOG b=0.2                              | 2.89%  | *8.44% | 12.22%        | 20.11% |
| EM-LOG b=0.5                              | *2.67% | 7.89%  | 12.33%        | 21.78% |
| EM-LOG b=1                                | 2.33%  | 7%     | 12.11%        | 21.67% |
| EM-LOG b=0.5xQ2( $\sigma$ )               | *2.89% | *8.22% | 12.44%        | 19.56% |
| EM-LOG b=1xQ2( $\sigma$ )                 | 2.44%  | *8.44% | 12%           | 20.78% |
| EM-LOG b=1.5xQ2( $\sigma$ )               | *2.67% | 8%     | 12.33%        | 21.67% |
| EM-LOG b=2xQ2( $\sigma$ )                 | *2.78% | 7.56%  | 12.6%         | 21.67% |
| EM-LOG b=6xQ2( $\sigma$ )                 | 2.00%  | 6.89%  | 12.44%        | 21.67% |

\* The methodology did not pass the error rate validation (i.e. misclassification rate was too high above significance margin), t-test,  $p < 0.01$ .

```
t.test(as.vector(cbind(t(rep(1,200)),t(rep(0,700)))),as.vector(cbind(t(rep(1,180)),t(rep(0,720)))))
```

Welch Two Sample t-test

data: as.vector(cbind(t(rep(1, 200)), t(rep(0, 700)))) and as.vector(cbind(t(rep(1, 180)), t(rep(0, 720))))

t = 1.1549, df = 1795.3, p-value = 0.2483

alternative hypothesis: true difference in means is not equal to 0

95 percent confidence interval:

-0.01551575 0.05996019

sample estimates:

mean of x mean of y

0.2222222 0.2000000

```
> t.test(as.vector(cbind(t(rep(1,114)),t(rep(0,786)))),as.vector(cbind(t(rep(1,90)),t(rep(0,810)))))
```

Welch Two Sample t-test

data: as.vector(cbind(t(rep(1, 114)), t(rep(0, 786)))) and as.vector(cbind(t(rep(1, 90)), t(rep(0, 810))))

t = 1.7851, df = 1779.2, p-value = 0.07442

alternative hypothesis: true difference in means is not equal to 0

95 percent confidence interval:

-0.002632368 0.055965701

sample estimates:

mean of x mean of y

0.1266667 0.1000000

```
> t.test(as.vector(cbind(t(rep(1,72)),t(rep(0,828)))),as.vector(cbind(t(rep(1,45)),t(rep(0,855)))))
```

Welch Two Sample t-test

data: as.vector(cbind(t(rep(1, 72)), t(rep(0, 828)))) and as.vector(cbind(t(rep(1, 45)), t(rep(0, 855))))

t = 2.5848, df = 1718.2, p-value = 0.009825

alternative hypothesis: true difference in means is not equal to 0

95 percent confidence interval:

0.007236116 0.052763884

sample estimates:

mean of x mean of y

0.08 0.05

```
> t.test(as.vector(cbind(t(rep(1,77)),t(rep(0,823)))),as.vector(cbind(t(rep(1,45)),t(rep(0,855)))))
```

Welch Two Sample t-test

data: as.vector(cbind(t(rep(1, 77)), t(rep(0, 823)))) and as.vector(cbind(t(rep(1, 45)), t(rep(0, 855))))

t = 3.0065, df = 1696.6, p-value = 0.002682

alternative hypothesis: true difference in means is not equal to 0

95 percent confidence interval:

0.01235985 0.05875126

sample estimates:

mean of x mean of y

0.08555556 0.05000000

```
> t.test(as.vector(cbind(t(rep(1,24)),t(rep(0,876)))),as.vector(cbind(t(rep(1,9)),t(rep(0,891)))))
```

Welch Two Sample t-test

data: as.vector(cbind(t(rep(1, 24)), t(rep(0, 876)))) and as.vector(cbind(t(rep(1, 9)), t(rep(0, 891))))

t = 2.6391, df = 1497.7, p-value = 0.0084

alternative hypothesis: true difference in means is not equal to 0

95 percent confidence interval:

0.00427877 0.02905456

sample estimates:

mean of x mean of y

0.02666667 0.01000000

**Table S2i.** CP efficiency results, i.e. prediction interval half-widths, on Water-900 test set (400) for FSTI-XGB model

| Method                                          |                    | 99%          |              | 95%          |              | 90%          |              | 80%          |              | average of all | average of |
|-------------------------------------------------|--------------------|--------------|--------------|--------------|--------------|--------------|--------------|--------------|--------------|----------------|------------|
|                                                 | $\beta$            | mean         | median       | mean         | median       | mean         | median       | mean         | median       | 8 statistics   | all means  |
| AR                                              | -                  | 2.367        | 2.367        | 1.496        | 1.496        | 1.230        | 1.230        | 0.918        | 0.918        | 1.503          | 1.503      |
| ARSS                                            | 0                  | 2.611        | 2.391        | 1.603        | 1.468        | 1.303        | 1.194        | 0.988        | 0.905        | 1.558          | 1.626      |
| <b>ARSS</b>                                     | <b>0.2</b>         | 2.226        | 2.143        | <b>1.445</b> | <b>1.391</b> | 1.193        | 1.149        | 0.898        | 0.864        | 1.414          | 1.441      |
| ARSS                                            | 0.5                | 2.294        | 2.247        | 1.512        | 1.481        | 1.171        | 1.147        | 0.889        | 0.871        | 1.452          | 1.467      |
| ARSS                                            | 1.0                | 2.314        | 2.287        | 1.510        | 1.493        | 1.180        | 1.167        | 0.908        | 0.898        | 1.470          | 1.478      |
| ARSS                                            | 0.5xQ2( $\sigma$ ) | 2.257        | 2.126        | 1.521        | 1.433        | 1.242        | 1.170        | 0.910        | 0.858        | 1.440          | 1.483      |
| ARSS                                            | 1.0xQ2( $\sigma$ ) | 2.243        | 2.144        | 1.473        | 1.408        | 1.216        | 1.162        | 0.904        | 0.864        | 1.427          | 1.459      |
| ARS                                             | 0                  | 2.665        | 2.441        | 1.661        | 1.521        | 1.307        | 1.197        | 0.956        | 0.876        | 1.578          | 1.647      |
| ARS                                             | 0.2xQ2( $\sigma$ ) | 2.370        | 2.201        | 1.573        | 1.461        | 1.242        | 1.153        | 0.924        | 0.858        | 1.473          | 1.527      |
| ARS                                             | 0.4xQ2( $\sigma$ ) | 2.219        | 2.082        | 1.565        | 1.468        | 1.234        | 1.158        | 0.897        | 0.841        | 1.433          | 1.479      |
| ARS                                             | 0.5xQ2( $\sigma$ ) | <b>2.177</b> | <b>2.050</b> | 1.536        | 1.447        | 1.240        | 1.168        | 0.899        | 0.847        | 1.421          | 1.463      |
| ARS                                             | 0.6xQ2( $\sigma$ ) | 2.184        | 2.065        | 1.527        | 1.444        | 1.230        | 1.163        | 0.903        | 0.854        | 1.421          | 1.461      |
| ARS                                             | 0.7xQ2( $\sigma$ ) | 2.211        | 2.097        | 1.528        | 1.449        | 1.229        | 1.166        | 0.908        | 0.861        | 1.431          | 1.469      |
| ARS                                             | 1.0xQ2( $\sigma$ ) | 2.282        | 2.181        | 1.500        | 1.434        | 1.221        | 1.167        | 0.984        | 0.854        | 1.453          | 1.497      |
| EM-N                                            | 0                  | 2.520        | 2.328        | 1.683        | 1.555        | 1.321        | 1.220        | 0.985        | 0.910        | 1.565          | 1.627      |
| EM-N                                            | 0.2                | 2.359        | 2.223        | 1.569        | 1.479        | 1.241        | 1.169        | 0.919        | 0.866        | 1.478          | 1.522      |
| EM-N                                            | 0.5                | 2.343        | 2.244        | 1.477        | 1.414        | 1.183        | 1.133        | 0.922        | 0.883        | 1.450          | 1.481      |
| EM-N                                            | 1.0                | 2.396        | 2.326        | 1.472        | 1.429        | <b>1.155</b> | <b>1.121</b> | 0.940        | 0.913        | 1.469          | 1.491      |
| EM-Log                                          | 0                  | 2.676        | 2.597        | 1.755        | 1.703        | 1.330        | 1.290        | 1.013        | 0.983        | 1.668          | 1.694      |
| EM-Log                                          | 0.2                | 2.246        | 2.200        | 1.593        | 1.560        | 1.219        | 1.194        | 0.911        | 0.892        | 1.477          | 1.492      |
| EM-Log                                          | 0.5                | 2.311        | 2.279        | 1.513        | 1.493        | 1.189        | 1.173        | 0.917        | 0.905        | 1.473          | 1.483      |
| EM-Log                                          | 1                  | 2.305        | 2.284        | 1.469        | 1.456        | 1.193        | 1.182        | 0.922        | 0.914        | 1.466          | 1.472      |
| EM-EXP                                          | 0                  | 2.737        | 2.227        | 1.740        | 1.415        | 1.374        | 1.118        | 1.054        | 0.857        | 1.565          | 1.726      |
| EM-EXP                                          | 0.2                | 2.688        | 2.229        | 1.686        | 1.397        | 1.340        | 1.111        | 1.031        | 0.855        | 1.542          | 1.686      |
| EM-EXP                                          | 0.5                | 2.652        | 2.249        | 1.645        | 1.395        | 1.294        | 1.097        | 1.004        | 0.852        | 1.524          | 1.649      |
| EM-EXP                                          | 1.0                | 2.619        | 2.283        | 1.636        | 1.427        | 1.281        | 1.116        | 0.995        | 0.867        | 1.528          | 1.633      |
| knn-EuD                                         | 0                  | 2.557        | 2.322        | 1.720        | 1.562        | 1.294        | 1.175        | 0.929        | 0.843        | 1.550          | 1.625      |
| knn-EuD                                         | 1xQ2( $\sigma$ )   | 2.506        | 2.383        | 1.596        | 1.517        | 1.234        | 1.174        | 0.890        | 0.847        | 1.518          | 1.557      |
| knn-EuD                                         | 2xQ2( $\sigma$ )   | 2.500        | 2.417        | 1.539        | 1.488        | 1.205        | 1.165        | <b>0.879</b> | <b>0.850</b> | 1.505          | 1.531      |
| knn-EuD                                         | 6xQ2( $\sigma$ )   | 2.424        | 2.389        | 1.468        | 1.447        | 1.181        | 1.164        | 0.897        | 0.884        | 1.482          | 1.493      |
| Q2( $\sigma$ , ARS)=Q2( $\sigma$ , ARSS)=0.1448 |                    |              |              |              |              |              |              |              |              |                |            |
| Q2( $\sigma$ , EM-N)=0.5506                     |                    |              |              |              |              |              |              |              |              |                |            |
| Q2( $\sigma$ , EM-LOG)=0.3922                   |                    |              |              |              |              |              |              |              |              |                |            |
| Q2( $\sigma$ , EM-EXP)=1.7264                   |                    |              |              |              |              |              |              |              |              |                |            |

**Table S2j.** CP error rate results, i.e. misclassification rates, on Water-900 test set (400) for FSTI-XGB model

|                                                 |         |         |            |        |
|-------------------------------------------------|---------|---------|------------|--------|
| Error rates                                     | 99.00%  | 95.00%  | 90.00%     | 80.00% |
| AR                                              | 2.75%** | 7.00%   | 12.75%     | 20.50% |
| ARSS b=0                                        | 1.25%   | 5.00%   | 9.25%      | 18.50% |
| ARSS b=0.2 (1.4xQ2( $\sigma$ ))                 | 2.25%   | 6.75%   | 10.00%     | 20.50% |
| ARSS b=0.5                                      | 2.50%   | 6.00%   | 12.50%     | 21.25% |
| ARSS b=1                                        | 2.50%   | 6.00%   | 13.75%*    | 20.25% |
| ARSS b=0.5xQ2( $\sigma$ )                       | 2.00%   | 6.75%   | 9.00%      | 20.50% |
| ARSS b=1xQ2( $\sigma$ )                         | 2.00%   | 6.75%   | 9.00%      | 20.50% |
| ARS b=0                                         | 1.25%   | 4.75%   | 9.25%      | 19.50% |
| ARS b=0.2xQ2( $\sigma$ )                        | 1.75%   | 5.50%   | 9.75%      | 20.50% |
| ARS b=0.4xQ2( $\sigma$ )                        | 2.00%   | 5.75%   | 9.00%      | 20.50% |
| ARS b=0.5xQ2( $\sigma$ )                        | 2.00%   | 6.25%   | 8.75%      | 20.75% |
| ARS b=0.6xQ2( $\sigma$ )                        | 2.00%   | 6.25%   | 8.75%      | 20.50% |
| ARS b=0.7xQ2( $\sigma$ )                        | 2.00%   | 6.25%   | 8.75%      | 20.50% |
| ARS b=1xQ2( $\sigma$ )                          | 2.00%   | 6.50%   | 8.75%      | 20.75% |
| EM-N b=0                                        | 2.00%   | 6.50%   | 12.25%     | 21.25% |
| EM-N b=0.2                                      | 2.25%   | 6.75%   | 12.25%     | 21.50% |
| EM-N b=0.5                                      | 2.00%   | 7.50%   | 12.50%     | 21.25% |
| EM-N b=1.0                                      | 2.00%   | 6.50%   | 12.25%     | 21.25% |
| EM-LOG b=0                                      | 1.75%   | 6.50%   | 12.00%     | 20.25% |
| EM-LOG b=0.2                                    | 2.00%   | 5.75%   | 12.00%     | 22.50% |
| EM-LOG b=0.5                                    | 2.25%   | 7.25%   | 12.00%     | 21.00% |
| EM-LOG b=1                                      | 2.25%   | 7.5%*** | 12.00%     | 20.50% |
| EM-EXP b=0                                      | 2.00%   | 7.00%   | 12.75%     | 21.75% |
| EM-EXP b=0.2                                    | 2.00%   | 7.25%   | 13.00%     | 21.75% |
| EM-EXP b=0.5                                    | 2.00%   | 7.5%*** | 13.00%     | 21.50% |
| EM-EXP b=1.0                                    | 2.00%   | 7.5%*** | 13.00%     | 20.75% |
| kNN-EuD b=0                                     | 2.75**  | 6.50%   | 11.25%     | 21.50% |
| kNN-EuD b=1 x Q2( $\sigma$ )                    | 2.50%   | 5.50%   | 11.75%     | 22.25% |
| kNN-EuD b=2 x Q2( $\sigma$ )                    | 2.50%   | 6.25%   | 12.50%     | 22.00% |
| kNN-EuD b=6 x Q2( $\sigma$ )                    | 2.50%   | 7.00%   | 14.25%**** | 20.75% |
| Q2( $\sigma$ , ARS)=Q2( $\sigma$ , ARSS)=0.1448 |         |         |            |        |
| Q2( $\sigma$ , EM-N)=0.5506                     |         |         |            |        |
| Q2( $\sigma$ , EM-LOG)=0.3922                   |         |         |            |        |
| Q2( $\sigma$ , EM-EXP)=1.7264                   |         |         |            |        |

\*

> t.test(t,h,var.equal=TRUE)

Two Sample t-test

data: t and h

t = 1.6401, df = 798, p-value = 0.1014

alternative hypothesis: true difference in means is not equal to 0

95 percent confidence interval:

-0.007381926 0.082381926

sample estimates:

mean of x mean of y

0.1375 0.1000

\*\*

> t.test(t,h,var.equal=TRUE)

data: t and h

t = 1.8261, df = 798, p-value = 0.06821

alternative hypothesis: true difference in means is not equal to 0

95 percent confidence interval:

-0.001311386 0.036311386

sample estimates:

mean of x mean of y

0.0275 0.0100

\*\*\*

> t.test(t,h,var.equal=TRUE)

data: t and h

t = 1.4607, df = 798, p-value = 0.1445

alternative hypothesis: true difference in means is not equal to 0

95 percent confidence interval:

-0.008595542 0.058595542

sample estimates:

mean of x mean of y

0.075 0.050

\*\*\*\*

Two Sample t-test

data: t and h

t = 1.8429, df = 798, p-value = 0.06571

alternative hypothesis: true difference in means is not equal to 0

95 percent confidence interval:

-0.002767565 0.087767565

sample estimates:

mean of x mean of y

0.1425 0.1000

**Table S2k.** CP efficiency results, i.e. prediction interval half-widhts, on Ethanol test set (139) for FSTI-XGB model

| Method      |                    | 99%          |              | 95%          |              | 90%          |              | 80%          |              | average of all | average of |
|-------------|--------------------|--------------|--------------|--------------|--------------|--------------|--------------|--------------|--------------|----------------|------------|
|             | $\beta$            | mean         | median       | mean         | median       | mean         | median       | mean         | median       | 8 statistics   | all means  |
| AR          | -                  | 2.034        | 2.034        | 1.361        | 1.361        | 1.040        | 1.040        | <b>0.732</b> | <b>0.732</b> | 1.292          | 1.292      |
| ARSS        | 0                  | 2.266        | 2.039        | 1.435        | 1.291        | 1.141        | 1.027        | 0.815        | 0.734        | 1.344          | 1.414      |
| ARSS        | 0.2                | 2.097        | 2.003        | 1.343        | 1.282        | 1.080        | 1.031        | 0.742        | 0.709        | 1.286          | 1.316      |
| ARSS        | 0.5                | 2.035        | 1.985        | 1.346        | 1.313        | 1.042        | 1.017        | 0.738        | 0.720        | 1.275          | 1.290      |
| ARSS        | 1.0                | 2.034        | 2.006        | 1.350        | 1.331        | 1.031        | 1.017        | 0.737        | 0.727        | 1.279          | 1.288      |
| ARSS        | 0.5xQ2( $\sigma$ ) | 2.201        | 2.051        | 1.348        | 1.256        | 1.062        | 0.990        | 0.771        | 0.718        | 1.300          | 1.346      |
| ARSS        | 1.0xQ2( $\sigma$ ) | 2.153        | 2.041        | 1.340        | 1.270        | 1.070        | 1.015        | 0.754        | 0.715        | 1.295          | 1.329      |
| EM-N        | 0                  | 2.366        | 2.007        | 1.479        | 1.250        | 1.163        | 0.986        | 0.892        | 0.756        | 1.362          | 1.475      |
| EM-N        | 0.2                | 2.056        | 1.831        | 1.418        | 1.263        | 1.062        | 0.946        | 0.813        | 0.724        | 1.264          | 1.337      |
| <b>EM-N</b> | <b>0.5</b>         | <b>1.887</b> | <b>1.742</b> | <b>1.382</b> | <b>1.276</b> | <b>1.014</b> | <b>0.936</b> | <b>0.787</b> | <b>0.727</b> | <b>1.219</b>   | 1.268      |
| EM-N        | 1.0                | <b>1.832</b> | <b>1.737</b> | 1.385        | 1.313        | 1.020        | 0.967        | 0.778        | 0.738        | 1.221          | 1.254      |
| EM-Log      | 0                  | 2.340        | 2.009        | 1.493        | 1.282        | 1.167        | 1.002        | 0.871        | 0.748        | 1.364          | 1.468      |
| EM-Log      | 0.2                | 2.040        | 1.856        | 1.367        | 1.243        | 1.017        | 0.925        | 0.806        | 0.734        | 1.249          | 1.308      |
| EM-Log      | 0.5                | 1.961        | 1.847        | 1.385        | 1.304        | 1.014        | 0.955        | 0.779        | 0.734        | 1.247          | 1.285      |
| EM-Log      | 1.0                | 1.934        | 1.863        | 1.357        | 1.307        | 1.033        | 0.995        | 0.764        | 0.736        | 1.249          | 1.272      |
| EM-Log      | 1.1xQ2( $\sigma$ ) | 1.998        | 1.853        | 1.402        | 1.301        | 1.024        | 0.950        | 0.792        | 0.735        | 1.257          | 1.304      |
| ARS         | 0                  | 2.248        | 2.023        | 1.399        | 1.256        | 1.163        | 1.047        | 0.823        | 0.741        | 1.338          | 1.408      |
| ARS         | 0.2                | 2.048        | 1.956        | 1.321        | 1.261        | 1.044        | 0.997        | 0.763        | 0.729        | 1.265          | 1.294      |
| ARS         | 0.5                | 2.013        | 1.963        | 1.356        | 1.323        | 1.039        | 1.014        | 0.763        | 0.745        | 1.277          | 1.293      |
| ARS         | 1.0                | 1.990        | 1.962        | 1.354        | 1.335        | 1.023        | 1.008        | 0.770        | 0.760        | 1.275          | 1.284      |
| ARS         | 0.5xQ2( $\sigma$ ) | 2.136        | 1.990        | <b>1.318</b> | <b>1.228</b> | 1.061        | 0.988        | 0.783        | 0.729        | 1.279          | 1.325      |
| ARS         | 1.0xQ2( $\sigma$ ) | 2.085        | 1.977        | 1.320        | 1.252        | 1.054        | 0.999        | 0.775        | 0.734        | 1.275          | 1.309      |

Q2( $\sigma$ , ARS)=Q2( $\sigma$ , ARSS)=0.1510

Q2( $\sigma$ , EM-N)=0.4516

Q2( $\sigma$ , EM-LOG)=0.3012

**Table S21.** CP error rate results, i.e. misclassification rates, on Ethanol test set (139) for FSTI-XGB model

|                                                 |        |        |        |          |
|-------------------------------------------------|--------|--------|--------|----------|
| Error rates                                     | 99.00% | 95.00% | 90.00% | 80.00%   |
| AR                                              | 2.16%  | 7.19%  | 16.55% | 30.93%   |
| ARSS b=0                                        | 2.16%  | 7.91%  | 14.39% | 30.22%   |
| ARSS b=0.2                                      | 2.16%  | 7.19%  | 10.79% | 33.81%** |
| ARSS b=0.5                                      | 2.16%  | 7.19%  | 15.11% | 31.65%*  |
| ARSS b=1                                        | 1.44%  | 7.19%  | 15.83% | 30.93%   |
| ARSS b=0.5*Q2( $\sigma$ )                       | 2.16%  | 7.91%  | 12.95% | 32.37%   |
| ARSS b=1*Q2( $\sigma$ )                         | 2.16%  | 7.91%  | 10.79% | 32.37%   |
| EM-N b=0                                        | 2.16%  | 8.63%  | 16.55% | 25.18%   |
| EM-N b=0.2                                      | 2.16%  | 7.19%  | 14.39% | 30.93%   |
| EM-N b=0.5 (1.107xQ2( $\sigma$ ))               | 2.88%  | 6.47%  | 13.67% | 30.21%   |
| EM-N b=1.0                                      | 3.60%  | 6.47%  | 13.67% | 29.50%   |
| EM-LOG b=0                                      | 2.88%  | 11.51% | 17.99% | 25.18%   |
| EM-LOG b=0.2                                    | 2.88%  | 9.35%  | 16.55% | 27.34%   |
| EM-LOG b=0.5                                    | 2.88%  | 7.19%  | 12.95% | 29.50%   |
| EM-LOG b=1.0                                    | 2.88%  | 7.19%  | 12.95% | 29.50%   |
| EM-LOG b=1.107*Q2( $\sigma$ )                   | 2.88%  | 7.19%  | 12.95% | 30.22%   |
| ARS b=0                                         | 2.16%  | 7.91%  | 14.39% | 29.50%   |
| ARS b=0.2                                       | 2.16%  | 7.19%  | 12.95% | 32.37%   |
| ARS b=0.5                                       | 2.16%  | 7.19%  | 15.11% | 29.50%   |
| ARS b=1                                         | 2.16%  | 7.19%  | 15.83% | 30.22%   |
| ARS b=0.5*Q2( $\sigma$ )                        | 2.16%  | 7.91%  | 12.95% | 31.65%   |
| ARS b=1*Q2( $\sigma$ )                          | 2.16%  | 7.91%  | 12.95% | 30.94%   |
| Q2( $\sigma$ , ARS)=Q2( $\sigma$ , ARSS)=0.1510 |        |        |        |          |
| Q2( $\sigma$ , EM-N)=0.4516                     |        |        |        |          |
| Q2( $\sigma$ , EM-LOG)=0.3012                   |        |        |        |          |

\*

```
> t.test(t,h,var.equal=TRUE)
```

Two Sample t-test

data: t and h

t = 2.2017, df = 276, p-value = 0.02851

alternative hypothesis: true difference in means is not equal to 0

95 percent confidence interval:

0.01218632 0.21802951

sample estimates:

mean of x mean of y

0.3165468 0.2014388

\*\*

```
> t.test(t,h,var.equal=TRUE)
```

Two Sample t-test

data: t and h

t = 2.589, df = 276, p-value = 0.01013

alternative hypothesis: true difference in means is not equal to 0

95 percent confidence interval:

0.03275724 0.24062406

sample estimates:

mean of x mean of y

0.3381295 0.2014388



**Table S2m.** CP efficiency results, i.e. prediction interval half-widhts, on Acetone test set (91) for FSTI-XGB model

| Method | $\beta$             | 99%          |              | 95%          |              | 90%          |              | 80%          |              | average of all 8 statistics | average of all means |
|--------|---------------------|--------------|--------------|--------------|--------------|--------------|--------------|--------------|--------------|-----------------------------|----------------------|
|        |                     | mean         | median       | mean         | median       | mean         | median       | mean         | median       |                             |                      |
| AR     | -                   | 1.801        | 1.801        | 1.344        | 1.344        | 1.047        | 1.047        | 0.741        | 0.741        | 1.233                       | 1.233                |
| ARSS   | 0                   | 2.220        | 2.024        | 1.424        | 1.299        | 1.170        | 1.067        | 0.833        | 0.760        | 1.350                       | 1.412                |
| ARSS   | 0.2                 | <b>1.797</b> | <b>1.737</b> | 1.302        | 1.259        | 1.087        | 1.051        | 0.739        | 0.714        | 1.211                       | 1.231                |
| ARSS   | 0.5                 | 1.810        | 1.778        | 1.323        | 1.300        | 1.064        | 1.046        | 0.742        | 0.729        | 1.224                       | 1.235                |
| ARSS   | 1.0                 | 1.801        | 1.784        | 1.324        | 1.311        | 1.063        | 1.053        | 0.740        | 0.733        | 1.226                       | 1.232                |
| ARSS   | 0.5xQ2( $\sigma$ )  | 1.912        | 1.793        | 1.362        | 1.278        | 1.089        | 1.022        | 0.788        | 0.739        | 1.248                       | 1.288                |
| ARSS   | 1.0xQ2( $\sigma$ )  | 1.858        | 1.769        | 1.319        | 1.256        | 1.079        | 1.028        | 0.748        | 0.713        | 1.221                       | 1.251                |
| EM-N   | 0                   | 2.100        | 1.959        | 1.394        | 1.301        | 1.061        | 0.990        | 0.744        | 0.695        | 1.281                       | 1.325                |
| EM-N   | 0.2                 | 2.051        | 1.954        | 1.290        | 1.229        | 1.033        | 0.985        | 0.728        | 0.693        | 1.245                       | 1.276                |
| EM-N   | 0.5                 | 2.001        | 1.936        | 1.243        | 1.202        | 1.006        | 0.974        | 0.705        | 0.682        | 1.219                       | 1.239                |
| EM-N   | 1.0                 | 1.941        | 1.899        | 1.241        | 1.214        | 1.009        | 0.987        | 0.704        | 0.689        | 1.211                       | 1.224                |
| EM-N   | 0.75xQ2( $\sigma$ ) | 2.025        | 1.801        | 1.260        | 1.211        | <b>1.001</b> | <b>0.962</b> | 0.712        | 0.685        | 1.207                       | 1.250                |
| EM-N   | 1.5xQ2( $\sigma$ )  | 1.976        | 1.922        | <b>1.240</b> | <b>1.206</b> | 1.006        | 0.979        | <b>0.701</b> | <b>0.682</b> | 1.214                       | 1.231                |
| EM-Log | 0                   | 2.198        | 2.096        | 1.469        | 1.400        | 1.166        | 1.111        | 0.802        | 0.765        | 1.376                       | 1.409                |
| EM-Log | 0.2                 | 2.006        | 1.948        | 1.300        | 1.263        | 1.069        | 1.038        | 0.761        | 0.739        | 1.266                       | 1.284                |
| EM-Log | 0.5                 | 1.967        | 1.931        | 1.311        | 1.287        | 1.033        | 1.014        | 0.743        | 0.729        | 1.252                       | 1.264                |
| EM-Log | 1.0                 | 1.917        | 1.895        | 1.278        | 1.263        | 1.011        | 0.999        | 0.723        | 0.715        | 1.225                       | 1.232                |
| EM-Log | 0.75xQ2( $\sigma$ ) | 1.997        | 1.942        | 1.299        | 1.263        | 1.052        | 1.023        | 0.755        | 0.734        | 1.258                       | 1.276                |
| EM-Log | 1.5xQ2( $\sigma$ )  | 1.976        | 1.937        | 1.313        | 1.287        | 1.036        | 1.016        | 0.748        | 0.733        | 1.256                       | 1.268                |
| ARS    | 0                   | 2.219        | 2.023        | 1.445        | 1.317        | 1.141        | 1.041        | 0.857        | 0.782        | 1.353                       | 1.416                |
| ARS    | 0.2                 | 1.869        | 1.807        | 1.314        | 1.270        | 1.069        | 1.033        | 0.747        | 0.722        | 1.229                       | 1.250                |
| ARS    | 0.5                 | 1.906        | 1.873        | 1.307        | 1.284        | 1.060        | 1.042        | 0.752        | 0.739        | 1.245                       | 1.256                |
| ARS    | 1.0                 | 1.958        | 1.939        | 1.348        | 1.335        | 1.042        | 1.032        | 0.739        | 0.732        | 1.266                       | 1.272                |
| ARS    | 0.5xQ2( $\sigma$ )  | 2.036        | 1.910        | 1.428        | 1.340        | 1.080        | 1.013        | 0.778        | 0.730        | 1.289                       | 1.331                |
| ARS    | 1.0xQ2( $\sigma$ )  | 1.934        | 1.842        | 1.390        | 1.324        | 1.069        | 1.018        | 0.745        | 0.709        | 1.254                       | 1.285                |

Q2( $\sigma$ , ARS)=Q2( $\sigma$ , ARSS)=0.1040Q2( $\sigma$ , EM-N)=0.4428Q2( $\sigma$ , EM-LOG)=0.2991

**Table S2n.** CP error rate results, i.e. misclassification rates, on Acetone test set (91) for FSTI-XGB model

|                                                 |        |        |        |          |
|-------------------------------------------------|--------|--------|--------|----------|
| Error rates                                     | 99.00% | 95.00% | 90.00% | 80.00%   |
| AR                                              | 1.10%  | 6.59%  | 14.29% | 28.57%*  |
| ARSS b=0                                        | 0.00%  | 6.59%  | 10.99% | 23.08%   |
| ARSS b=0.2                                      | 0      | 5.49%  | 14.29% | 24.18%   |
| ARSS b=0.5                                      | 0      | 5.49%  | 14.29% | 24.18%   |
| ARSS b=1                                        | 0      | 5.49%  | 14.29% | 24.18%   |
| ARSS b=0.5*Q2( $\sigma$ )                       | 0      | 5.49%  | 14.29% | 21.98%   |
| ARSS b=1*Q2( $\sigma$ )                         | 0      | 5.49%  | 13.19% | 24.18%   |
| EM-N b=0                                        | 0      | 4.40%  | 12.09% | 29.67%   |
| EM-N b=0.2                                      | 0      | 3.30%  | 12.09% | 31.87%** |
| EM-N b=0.5                                      | 0      | 5.49%  | 15.38% | 30.77%   |
| EM-N b=1.0                                      | 0      | 5.49%  | 15.38% | 30.77%   |
| EM-N b=0.75*Q2( $\sigma$ )                      | 0      | 4.40%  | 15.38% | 30.77%   |
| EM-N b=1.5*Q2( $\sigma$ )                       | 0      | 5.49%  | 15.38% | 30.77%   |
| EM-LOG b=0                                      | 1.10%  | 2.20%  | 8.79%  | 24.18%   |
| EM-LOG b=0.2                                    | 1.10%  | 4.40%  | 9.89%  | 26.37%   |
| EM-LOG b=0.5                                    | 0      | 3.30%  | 13.19% | 29.67%   |
| EM-LOG b=1.0                                    | 0      | 6.59%  | 15.38% | 30.77%   |
| EM-LOG b=0.75*Q2( $\sigma$ )                    | 1.10%  | 4.40%  | 12.09% | 28.57%   |
| EM-LOG b=1.5*Q2( $\sigma$ )                     | 0      | 3.30%  | 13.19% | 29.67%   |
| ARS b=0                                         | 0      | 6.59%  | 10.99% | 23.08%   |
| ARS b=0.2                                       | 0      | 4.40%  | 13.19% | 24.18%   |
| ARS b=0.5                                       | 0      | 6.59%  | 14.29% | 24.18%   |
| ARS b=1                                         | 0      | 5.49%  | 15.38% | 28.57%   |
| ARS b=0.5*Q2( $\sigma$ )                        | 0      | 4.40%  | 14.29% | 22.00%   |
| ARS b=1*Q2( $\sigma$ )                          | 0      | 2.20%  | 13.19% | 24.18%   |
| Q2( $\sigma$ , ARS)=Q2( $\sigma$ , ARSS)=0.1040 |        |        |        |          |
| Q2( $\sigma$ , EM-N)=0.4428                     |        |        |        |          |
| Q2( $\sigma$ , EM-LOG)=0.2991                   |        |        |        |          |

\*

```
> t.test(vect_telta_80,vect_pred_y_80,var.equal=TRUE)
```

Two Sample t-test

data: vect\_telta\_80 and vect\_pred\_y\_80

t = -1.3847, df = 180, p-value = 0.1679

alternative hypothesis: true difference in means is not equal to 0

95 percent confidence interval:

-0.21318732 0.03736314

sample estimates:

mean of x mean of y

0.1978022 0.2857143

\*\*

```
> t.test(vect_telta_80,vect_pred_y_80,var.equal=TRUE)
```

Two Sample t-test

data: vect\_telta\_80 and vect\_pred\_y\_80

t = -1.8707, df = 180, p-value = 0.06302

alternative hypothesis: true difference in means is not equal to 0

95 percent confidence interval:

-0.248386417 0.006628176

sample estimates:

mean of x mean of y

0.1978022 0.3186813

**Table S2o.** CP efficiency results, i.e. prediction interval half-widths, on Methanol test set (36) for FSTI-XGB model

| Method      |                    | 99%          |              | 95%          |              | 90%          |              | 80%          |              | average of all | average of   |
|-------------|--------------------|--------------|--------------|--------------|--------------|--------------|--------------|--------------|--------------|----------------|--------------|
|             | $\beta$            | mean         | median       | mean         | median       | mean         | median       | mean         | median       | 8 statistics   | all means    |
| AR          | -                  | 2.392        | 2.392        | 1.351        | 1.351        | 1.194        | 1.194        | 0.810        | 0.810        | 1.437          | 1.437        |
| ARSS        | 0                  | 7.794        | 7.686        | 1.569        | 1.547        | 1.275        | 1.258        | 1.073        | 1.058        | 2.908          | 2.928        |
| ARSS        | 0.2                | 2.828        | 2.811        | 1.349        | 1.340        | 1.209        | 1.202        | 0.865        | 0.859        | 1.558          | 1.563        |
| ARSS        | 0.5                | 2.561        | 2.552        | 1.367        | 1.363        | 1.187        | 1.183        | 0.854        | 0.851        | 1.490          | 1.492        |
| ARSS        | 1.0                | 2.485        | 2.480        | 1.377        | 1.375        | 1.157        | 1.155        | 0.831        | 0.830        | 1.461          | 1.463        |
| ARSS        | 0.5xQ2( $\sigma$ ) | 3.976        | 3.937        | 1.355        | 1.342        | 1.214        | 1.202        | 0.973        | 0.963        | 1.870          | 1.880        |
| ARSS        | 1.0xQ2( $\sigma$ ) | 3.155        | 3.132        | 1.345        | 1.335        | 1.199        | 1.191        | 0.887        | 0.881        | 1.641          | 1.647        |
| ARSS        | 2.0xQ2( $\sigma$ ) | 2.657        | 2.643        | 1.340        | 1.333        | 1.218        | 1.212        | 0.862        | 0.857        | 1.515          | 1.519        |
| ARSS        | 3.0xQ2( $\sigma$ ) | 2.587        | 2.578        | 1.359        | 1.354        | 1.198        | 1.194        | 0.848        | 0.845        | 1.495          | 1.498        |
| ARSS        | 6.0xQ2( $\sigma$ ) | 2.502        | 2.496        | 1.382        | 1.379        | 1.161        | 1.159        | 0.836        | 0.834        | 1.469          | 1.470        |
| ARS         | 0                  | 7.812        | 7.703        | 1.600        | 1.578        | 1.242        | 1.225        | 1.047        | 1.033        | 2.905          | 2.925        |
| ARS         | 0.2                | 2.835        | 2.817        | 1.300        | 1.292        | 1.079        | 1.072        | 0.856        | 0.851        | 1.513          | 1.518        |
| ARS         | 0.5                | 2.491        | 2.482        | 1.324        | 1.320        | <b>1.041</b> | <b>1.038</b> | 0.833        | 0.831        | 1.420          | 1.422        |
| ARS         | 1.0                | 2.417        | 2.413        | 1.337        | 1.334        | 1.071        | 1.069        | 0.808        | 0.807        | 1.407          | 1.408        |
| ARS         | 2.0xQ2( $\sigma$ ) | 2.602        | 2.589        | 1.309        | 1.303        | 1.055        | 1.050        | 0.840        | 0.836        | 1.448          | 1.452        |
| ARS         | 3.0xQ2( $\sigma$ ) | 2.517        | 2.507        | 1.320        | 1.315        | 1.045        | 1.041        | 0.834        | 0.831        | 1.426          | 1.429        |
| ARS         | 6.0xQ2( $\sigma$ ) | 2.433        | 2.428        | 1.334        | 1.331        | 1.058        | 1.056        | 0.814        | 0.812        | 1.408          | 1.410        |
| ARS         | 10xQ2( $\sigma$ )  | 2.394        | 2.391        | 1.341        | 1.339        | 1.066        | 1.065        | <b>0.802</b> | <b>0.801</b> | 1.400          | 1.401        |
| EM-N        | 0                  | 2.192        | 2.112        | 1.514        | 1.458        | 1.285        | 1.237        | 0.891        | 0.858        | 1.443          | 1.471        |
| EM-N        | 0.2                | <b>1.938</b> | <b>1.886</b> | 1.448        | 1.409        | 1.172        | 1.140        | 0.841        | 0.819        | 1.332          | 1.350        |
| EM-N        | 0.5                | 2.034        | 1.994        | 1.339        | 1.313        | 1.181        | 1.158        | 0.841        | 0.825        | 1.336          | 1.349        |
| <b>EM-N</b> | <b>1.0</b>         | <b>2.117</b> | <b>2.090</b> | <b>1.232</b> | <b>1.216</b> | <b>1.147</b> | <b>1.132</b> | <b>0.837</b> | <b>0.826</b> | <b>1.325</b>   | <b>1.333</b> |
| EM-N        | 1.5xQ2( $\sigma$ ) | 2.084        | 2.052        | 1.274        | 1.254        | 1.156        | 1.138        | 0.842        | 0.829        | 1.329          | 1.339        |
| EM-N        | 3.0xQ2( $\sigma$ ) | 2.164        | 2.143        | 1.243        | 1.231        | 1.120        | 1.109        | 0.849        | 0.841        | 1.338          | 1.344        |
| EM-N        | 4.0xQ2( $\sigma$ ) | 2.193        | 2.175        | 1.255        | 1.246        | 1.109        | 1.100        | 0.848        | 0.841        | 1.346          | 1.351        |
| EM-N        | 6.0xQ2( $\sigma$ ) | 2.226        | 2.214        | 1.270        | 1.262        | 1.118        | 1.112        | 0.826        | 0.822        | 1.356          | 1.360        |
| EM-N        | 1.0xQ2( $\sigma$ ) | 2.035        | 1.996        | 1.336        | 1.311        | 1.180        | 1.157        | 0.841        | 0.824        | 1.335          | 1.348        |
| EM-N        | 0.5xQ2( $\sigma$ ) | 1.959        | 1.910        | 1.440        | 1.404        | 1.154        | 1.125        | 0.848        | 0.826        | 1.333          | 1.350        |
| EM-Log      | 0                  | 3.488        | 3.062        | 1.944        | 1.707        | 1.414        | 1.241        | 1.022        | 0.897        | 1.847          | 1.967        |
| EM-Log      | 0.2                | 2.111        | 1.933        | 1.532        | 1.403        | 1.225        | 1.121        | 0.929        | 0.851        | 1.388          | 1.449        |
| EM-Log      | 0.5                | 2.173        | 2.048        | 1.392        | 1.312        | 1.191        | 1.122        | 0.888        | 0.837        | 1.370          | 1.411        |
| EM-Log      | 1.0                | 2.220        | 2.137        | 1.305        | 1.256        | 1.133        | 1.090        | 0.882        | 0.849        | 1.359          | 1.385        |
| EM-Log      | 1.0xQ2( $\sigma$ ) | 2.152        | 2.009        | 1.402        | 1.309        | 1.217        | 1.136        | 0.901        | 0.841        | 1.371          | 1.418        |
| EM-Log      | 1.5xQ2( $\sigma$ ) | 2.181        | 2.063        | 1.388        | 1.313        | 1.181        | 1.117        | 0.888        | 0.840        | 1.371          | 1.410        |
| EM-Log      | 2.0xQ2( $\sigma$ ) | 2.201        | 2.101        | 1.348        | 1.286        | 1.157        | 1.105        | 0.887        | 0.846        | 1.366          | 1.398        |
| EM-Log      | 3.0xQ2( $\sigma$ ) | 2.228        | 2.150        | 1.291        | 1.246        | 1.128        | 1.089        | 0.873        | 0.842        | 1.356          | 1.380        |
| EM-Log      | 6.0xQ2( $\sigma$ ) | 2.264        | 2.218        | 1.286        | 1.260        | 1.096        | 1.074        | 0.838        | 0.821        | 1.357          | 1.371        |

Q2( $\sigma$ , ARS)=Q2( $\sigma$ , ARSS)=0.1388Q2( $\sigma$ , EM-N)=0.5058Q2( $\sigma$ , EM-LOG)=0.3735

**Table S2p.** CP error rate results, i.e. misclassification rates, on Methanol test set (36) for FSTI-XGB model

|                                                 |        |        |        |        |
|-------------------------------------------------|--------|--------|--------|--------|
| Error rates                                     | 99.00% | 95.00% | 90.00% | 80.00% |
| AR                                              | 0.00%  | 11.11% | 11.11% | 30.56% |
| ARSS b=0                                        | 0.00%  | 2.78%  | 8.33%  | 11.11% |
| ARSS b=0.2                                      | 0.00%  | 5.56%  | 8.33%  | 16.67% |
| ARSS b=0.5                                      | 0.00%  | 8.33%  | 11.11% | 19.44% |
| ARSS b=1                                        | 0.00%  | 8.33%  | 11.11% | 25.00% |
| ARSS b=0.5*Q2( $\sigma$ )                       | 0.00%  | 5.56%  | 8.33%  | 16.67% |
| ARSS b=1*Q2( $\sigma$ )                         | 0.00%  | 5.56%  | 8.33%  | 16.67% |
| ARSS b=2*Q2( $\sigma$ )                         | 0.00%  | 5.56%  | 8.33%  | 16.67% |
| ARSS b=3*Q2( $\sigma$ )                         | 0.00%  | 8.33%  | 8.33%  | 22.22% |
| ARSS b=6*Q2( $\sigma$ )                         | 0.00%  | 8.33%  | 11.11% | 22.22% |
| ARS b=0                                         | 0.00%  | 2.78%  | 8.33%  | 13.89% |
| ARS b=0.2                                       | 0.00%  | 5.56%  | 13.89% | 16.67% |
| ARS b=0.5                                       | 0.00%  | 8.33%  | 13.89% | 22.22% |
| ARS b=1                                         | 0.00%  | 8.33%  | 11.11% | 30.56% |
| ARS b=2*Q2( $\sigma$ )                          | 0.00%  | 8.33%  | 13.89% | 22.22% |
| ARS b=3*Q2( $\sigma$ )                          | 0.00%  | 8.33%  | 13.89% | 22.22% |
| ARS b=6*Q2( $\sigma$ )                          | 0.00%  | 8.33%  | 13.89% | 30.56% |
| ARS b=10*Q2( $\sigma$ )                         | 0.00%  | 8.33%  | 11.11% | 30.56% |
| EM-N b=0                                        | 0.00%  | 2.78%  | 13.89% | 22.22% |
| EM-N b=0.2                                      | 0.00%  | 5.56%  | 13.89% | 22.22% |
| EM-N b=0.5                                      | 0.00%  | 5.56%  | 11.11% | 22.22% |
| EM-N b=1.0                                      | 0.00%  | 8.33%  | 8.33%  | 22.22% |
| EM-N b=1.5*Q2( $\sigma$ )                       | 0.00%  | 8.33%  | 11.11% | 22.22% |
| EM-N b=3*Q2( $\sigma$ )                         | 0.00%  | 8.33%  | 11.11% | 22.22% |
| EM-N b=4*Q2( $\sigma$ )                         | 0.00%  | 8.33%  | 11.11% | 22.22% |
| EM-N b=6*Q2( $\sigma$ )                         | 0.00%  | 8.33%  | 11.11% | 25.00% |
| EM-N b=1*Q2( $\sigma$ )                         | 0.00%  | 5.56%  | 11.11% | 22.22% |
| EM-N b=0.5*Q2( $\sigma$ )                       | 0.00%  | 5.56%  | 13.89% | 22.22% |
| EM-LOG b=0                                      | 0.00%  | 2.78%  | 8.33%  | 16.67% |
| EM-LOG b=0.2                                    | 2.78%  | 5.56%  | 8.33%  | 19.44% |
| EM-LOG b=0.5                                    | 0.00%  | 5.56%  | 8.33%  | 22.22% |
| EM-LOG b=1.0                                    | 0.00%  | 8.33%  | 8.33%  | 22.22% |
| EM-LOG b=1.0*Q2( $\sigma$ )                     | 2.78%  | 5.56%  | 8.33%  | 22.22% |
| EM-LOG b=1.5*Q2( $\sigma$ )                     | 0.00%  | 5.56%  | 8.33%  | 22.22% |
| EM-LOG b=2*Q2( $\sigma$ )                       | 0.00%  | 8.33%  | 8.33%  | 22.22% |
| EM-LOG b=3*Q2( $\sigma$ )                       | 0.00%  | 8.33%  | 8.33%  | 22.22% |
| EM-LOG b=6*Q2( $\sigma$ )                       | 0.00%  | 8.33%  | 11.11% | 25.00% |
| Q2( $\sigma$ , ARS)=Q2( $\sigma$ , ARSS)=0.1388 |        |        |        |        |
| Q2( $\sigma$ , EM-N)=0.5058                     |        |        |        |        |
| Q2( $\sigma$ , EM-LOG)=0.3735                   |        |        |        |        |

```
> t.test(as.vector(cbind(t(rep(1,7)),t(rep(0,29)))),as.vector(cbind(t(rep(1,11)),t(rep(0,25)))),var.equal=TRUE)
```

#### Two Sample t-test

```
data: as.vector(cbind(t(rep(1, 7)), t(rep(0, 29)))) and as.vector(cbind(t(rep(1, 11)), t(rep(0, 25))))
```

```
t = -1.0824, df = 70, p-value = 0.2828
```

```
alternative hypothesis: true difference in means is not equal to 0
```

```
95 percent confidence interval:
```

```
-0.31584879 0.09362657
```

```
sample estimates:
```

```
mean of x mean of y
```

```
0.1944444 0.3055556
```

```
> t.test(t,h,var.equal=TRUE)
```

#### Two Sample t-test

```
data: t and h  
t = 0.35167, df = 70, p-value = 0.7261  
alternative hypothesis: true difference in means is not equal to 0  
95 percent confidence interval:  
-0.1297572 0.1853128  
sample estimates:  
mean of x mean of y  
0.1388889 0.1111111
```

```
> t.test(t,h,var.equal=TRUE)
```

#### Two Sample t-test

```
data: t and h  
t = 0.4578, df = 70, p-value = 0.6485  
alternative hypothesis: true difference in means is not equal to 0  
95 percent confidence interval:  
-0.09323802 0.14879357  
sample estimates:  
mean of x mean of y  
0.08333333 0.05555556
```

```
> t.test(t,h,var.equal=TRUE)
```

#### Two Sample t-test

```
data: t and h  
t = 1, df = 70, p-value = 0.3208  
alternative hypothesis: true difference in means is not equal to 0  
95 percent confidence interval:  
-0.02762325 0.08317881  
sample estimates:  
mean of x mean of y  
0.02777778 0.00000000
```

## Info section S4: CP estimation of the LogS $\pm$ 1 Accuracy on Databases void of experimental

### LogS Calculation of Drugbank (total 11370 compounds, 11130 within AD)

#### Part 1. Calculation of FSTI-XGB-ARSS model for AqSolDB-n (Aq-n of 10,413 compounds) :

median 80% prediction interval:

```
> median(pred_y_half_width_80perc_AD2)
[1] 0.8878234 - Comment: so half of 10413 compounds have LogS half-width narrower and the other half wider error margin than 0.8878234 LogS at 80% conf. level
> quantile(pred_y_half_width_80perc_AD2) # This is actually percentile analysis
 0%   25%   50%   75%  100%
0.4703049 0.7858999 0.8878234 1.0080010 1.8880263
> quantile(pred_y_half_width_80perc_AD2,c(0.74))
 74%
1.002856
> quantile(pred_y_half_width_80perc_AD2,c(0.73))
 73% - 73rd percentile has 0.9977111 LogS half-width
0.9977111 Conclusion: 73% of comps have LogS $\pm$ 1 accuracy >80%

> quantile(pred_y_half_width_80perc_AD2,c(0.736))
0.9999013
```

0.73\* length(pred\_y\_half\_width\_80perc\_AD2)/11370 =  
= 66.9% of total Drugbank are within 1logS at 80% conf. level #Comment: This is to explain how I obtained 67% of Upper left Drugbank dark green part of pie -it takes into account 11370 compounds. It should NOT be confused with AqSolDB-n AD selected compounds (10413 compounds) which make 73.8% (Table 8).

```
> quantile(pred_y_half_width_90perc_AD2,c(0.1,0.2,0.3,0.4,0.45)) Comment: this is 90% conf. level analysis
 10%   20%   30%   40%   45%
1.002190 1.080600 1.141776 1.201261 1.228098
> quantile(pred_y_half_width_90perc_AD2,c(0.09,0.2,0.3,0.4,0.45))
 9%   20%   30%   40%   45%
0.9933634 1.0805998 1.1417762 1.2012606 1.2280976
> quantile(pred_y_half_width_90perc_AD2,c(0.08,0.09,0.1))
 8%   9%   10%
0.9799835 0.9933634 1.0021904 Conclusion: 9% of comps have LogS $\pm$ 1 accuracy >90%

> median(pred_y_half_width_70perc_AD2)
[1] 0.7095413
> quantile(pred_y_half_width_70perc_AD2)
 0%   25%   50%   75%  100%
0.3758639 0.6280849 0.7095413 0.8055863 1.5088955
> quantile(pred_y_half_width_70perc_AD2,c(0.9,0.95,0.96,0.97))
 90%   95%   96%   97%
0.9072591 0.9777004 0.9968375 1.0223545 Conclusion: 96% of comps have LogS $\pm$ 1 accuracy > 70% (i.e. the weakest 4% have accuracy < 70%)
pred_y_half_width_92perc_AD2<-st_d_y_AD2_2*(sort((abs(telta-B1)/STDEV_CPcv_2),decreasing=TRUE)
[(length(B1)+1) %/% (100/8)]) *fact90
> quantile(pred_y_half_width_92perc_AD2,c(0.02,0.025,0.03,0.04,0.05,0.06))
 2%   2.5%   3%   4%   5%   6%
0.9221746 0.9489805 0.9760705 1.0066086 1.0267221 1.0433343 Conclusion: 4% of comps have LogS $\pm$ 1 accuracy >92%
> quantile(pred_y_half_width_95perc_AD2,c(0.01,0.015,0.02))
 1%   1.5%   2%
0.9583413 1.0079200 1.0479614 Conclusion: 1.5% of comps have LogS $\pm$ 1 accuracy >95%
```

Acc. of 0-1.5% comps >95%

Acc. of 1.5%-4% comps >92%

Acc. of 4%-9% comps >90% (average between 90 and 92 = 91)  
 So, 5% (9%-4%=5%) of AqSolDB-n have estimated acc. of 91% LogS±1  
 Acc. of 9%-73% comps >80% (85% average acc.)  
 So, 64% (73%-9%=64%) of AqSolDB-n have estimated acc. of 85% acc.  
 Acc. of 73%-96% comps > 70% (average between 80 and 70 = 75%)  
 So, 23% (96%-73%=23%) of AqSolDB-n have estimated acc. of 75% acc.  
 96-100% < 70%  
 4% above 92% acc. and 4% below 70% acc. are approximated to be disregarded.  

$$> (0.91*0.05+0.85*0.64+0.75*0.23)/(0.05+0.64+0.23)$$
  
**[1] 0.8282609** That is accuracy of the AqSolDB-n (having 10413 comps out of 11130)

## Part 2. Calculation of FSTI-XGB-EM-N model for AqSolDB-w (Aq-w of 717 compounds):

```
median(pred_y_half_width_80perc_AD2)
1.478717
mean(pred_y_half_width_80perc_AD2)
1.492991
> pred_y_half_width_633perc<- error_te_DB*(sort(alfa_value,decreasing=TRUE)[length(B1) %/% (100/367)])
*fact633
> mean(pred_y_half_width_80perc)/mean(pred_y_half_width_633perc)
[1] 1.49263
mean AqSolDB-w at 90% conf. is 1.492991.
So, 1.49263 ≈ 1.492991
So, 63.3% is estimated accuracy of AqSolDB-w (having 717 comps out of 11130)
```

## Part 3. Final calculation Aq-n + Aq-w

Therefore

```
> (10413*0.8283 + 717*0.633)/(10413+717)
```

**[1] 0.81571 (i.e. 81.57%) - total accuracy of all Drugbank comps with AD (11130)**

Overview of the overall Drugbank accuracy statistics:

717 – 63.7% acc.

|                 |     |                                                   |
|-----------------|-----|---------------------------------------------------|
| 4% <70% acc.    | 4%  | 70% > %logS ±1                                    |
| 23% - 75% acc.  | 23% | 70% < %logS ±1 < 80% (average 75% acc.)           |
| 64% - 85%       | 64% | 80% < %logS ±1 < 90% (average 85% acc.)           |
| 9% > 90% acc.   | 9%  | %logS ±1 > 90%                                    |
| 5% ca. 91% acc. | 4%  | %logS ±1 > 92% (average for 5% comps is 91% acc.) |
| 4% >92% acc.    |     |                                                   |

## Calculation of PubChem (total 72739 compounds, 71808 within AD)

### Part 1. Calculation of FSTI-XGB-ARSS model for AqSolDB-n (Aq-n of 68,535 compounds):

```
> median(pred_y_half_width_80perc_AD2) # 80% conf. level
[1] 0.8851128
> quantile(pred_y_half_width_80perc_AD2)
 0%   25%   50%   75%  100%
0.4731928 0.7946685 0.8851128 0.9978667 2.0995683 Conclusion: 75% of comps have LogS±1 accuracy >80%

> quantile(pred_y_half_width_90perc_AD2,c(0.06,0.2,0.3,0.4,0.45))
 6%   20%   30%   40%   45%
1.000498 1.099471 1.152448 1.203032 1.228786 Conclusion: 6% of comps have LogS±1 accuracy >90%

median( pred_y_half_width_70perc_AD2)
[1] 0.707375
> quantile(pred_y_half_width_70perc_AD2,c(0.9,0.95,0.96,0.97))
```

90% 95% **96%** 97%  
 0.9024929 0.9789299 1.0039394 1.0341793 **Conclusion: 96% of comps have LogS±1 accuracy > 70%**  
 pred\_y\_half\_width\_91perc\_AD2<-st\_d\_y\_AD2\_2\*(sort((abs(telta-B1)/STDEV\_CPcv\_2),decreasing=TRUE)  
 [(length(B1)+1) %/% (100/9)]) \*fact91  
 > quantile(pred\_y\_half\_width\_91perc\_AD2,c(0.01,0.02,0.03,0.035,0.04))  
 1% 2% 3% 3.5% 4%  
 0.9390752 0.9735583 0.9943581 1.0029352 1.0112464 **Conclusion: 3.5% of comps have LogS±1 accuracy > 91% - but that wouldn't affect significantly our result.**

0-6% >90%  
 6%-75% >80%  
 75%-96% >70%  
 69% comps have an average of 85% acc.  
 21% have an average of 75% acc.  
**(0.69\*0.85+0.21\*0.75)/(0.69+0.21)=82.7% - That is the accuracy of the AqSolDB-n**

## Part 2. Calculation of FSTI-XGB-EM-N model for AqSolDB-w (Aq-w of 3273 compounds):

> median(pred\_y\_half\_width\_80perc\_AD2) # 80% conf. level  
 [1] 1.7788  
 > mean(pred\_y\_half\_width\_80perc\_AD2) # 80% conf. level  
 [1] 1.790132  
 As mean 80% pred. int. of AqSolDB-w equals 1.790132:  
  
 > pred\_y\_half\_width\_553perc<- error\_te\_DB\*(sort(alfa\_value,decreasing=TRUE)[length(B1) %/% (1000/447)])  
 \*fact553  
 > mean(pred\_y\_half\_width\_80perc)/mean(pred\_y\_half\_width\_553perc)  
 [1] 1.78805  
 1.790132 ≈ 1.78805  
**So, 55.3% LogS±1 is estimated accuracy of AqSolDB-w (having 3273 comps out of 72739)**

## Part 3. Final calculation Aq-n + Aq-w

(68535\*0.827+3273\*0.553)/(68535+3273)  
**[1] 0.8145111 (i.e. 81.45%) - total accuracy rate LogS±1 of all PubChem compounds within AD (71808)**

## Calculation of COCONUT (total 406,919 compounds, 390338 within AD)

### Part 1. Calculation of FSTI-XGB-ARSS model for AqSolDB-n (Aq-n of 356,277 compounds):

> median(pred\_y\_half\_width\_80perc\_AD2)  
 [1] 0.9180074  
  
 > quantile(pred\_y\_half\_width\_80perc\_AD2,c(0.6,0.65,0.66,0.67,0.7))  
 60% 65% 66% 67% 70%  
 0.9638526 0.9897033 0.9950762 1.0005594 1.0176978 **Conclusion: 67% of comps have LogS±1 accuracy >80%**  
  
 > 0.67\*356277/406919  
 [1] 0.586617  
 58.7% total COCONUT crystal structures are within 1 logS unit with 80% conf. level (Table 8)  
  
 > quantile(pred\_y\_half\_width\_90perc\_AD2,c(0.02,0.045,0.05))  
 2% 4.5% 5%  
 0.9508365 0.9990918 1.0063742 **Conclusion: 4.5% of comps have LogS±1 accuracy >90%**  
  
 > quantile(pred\_y\_half\_width\_70perc\_AD2,c(0.9,0.93,0.936,0.94,0.95))  
 90% 93% 93.6% 94% 95%  
 0.9511727 0.9897025 0.9989621 1.0056015 1.0228496 **Conclusion: 93.6% of comps have LogS±1 accuracy >70%**



quantile(pred\_y\_half\_width\_68perc\_AD2,c(0.9,0.91,0.92,0.95,0.96,0.965,0.97))

90% 91% 92% 95% 96% 96.5% 97%

0.9046278 0.9154991 0.9276716 0.9727973 0.9919681 1.0027882 1.0147560 Conclusion: 96% of comps have LogS±1 accuracy >68%

acc. of 0-4.5% comps > 90%

So, 4.5% of AqSolDB-n have acc. of LogS±1 >90%

acc. of 4.5%-67% comps > 80% (average between 90% and 80% = 85%)

So, 4.5%-67%, i.e. 62.5% (as 67%-4.5%=62.5%) of AqSolDB-n have estimated acc. of LogS±1 = 85%

acc. of 67%-93.6% comps >70% (average between 80% and 70% = 75%)

So, 67%-93.6%, i.e. 26.6% (as 93.6%-67%=26.6%) of AqSolDB-n have estimated acc. of LogS±1 = 75%

acc. of 93.6%-96% comps >68% (average between 70% and 68% = 69%)

So, 93.6%-96%, i.e. 2.4% (as 96%-93.6%=2.4%) of AqSolDB-n have estimated acc. of LogS±1 = 69%

$(0.625*0.85+0.266*0.75+0.024*0.69)/(0.96-0.045) = 0.816733$  (81.7%) – That is the accuracy of the AqSolDB-n (having 356277 comps)

## Part 2. Calculation of FSTI-XGB-EM-N model for AqSolDB-w (Aq-w of 34,061 compounds):

median(pred\_y\_half\_width\_80perc)

1.491423

mean(pred\_y\_half\_width\_80perc)

1.54571

> mean(pred\_y\_half\_width\_80perc)/mean(pred\_y\_half\_width\_617perc)

[1] 1.545277

1.54571  $\approx$  1.545277

So, AqSolDB-w accuracy rate is 61.7%

## Part 3. Final calculation Aq-n + Aq-w

> 34061/390338

[1] 0.08726027 – fraction of AqSolDB-w compounds

> (390338-34061)/390338

[1] 0.9127397 – fraction of AqSolDB-n compounds

> 0.617\*0.08726+0.8167\*0.91274

[1] 0.7992742 (79.93%) total accuracy rate rate LogS±1 of 390338 COCONUT compounds within AD (96% of total 406919 compounds)

Proof of positive correlation between Mw and interval half-widths of PubChem compounds

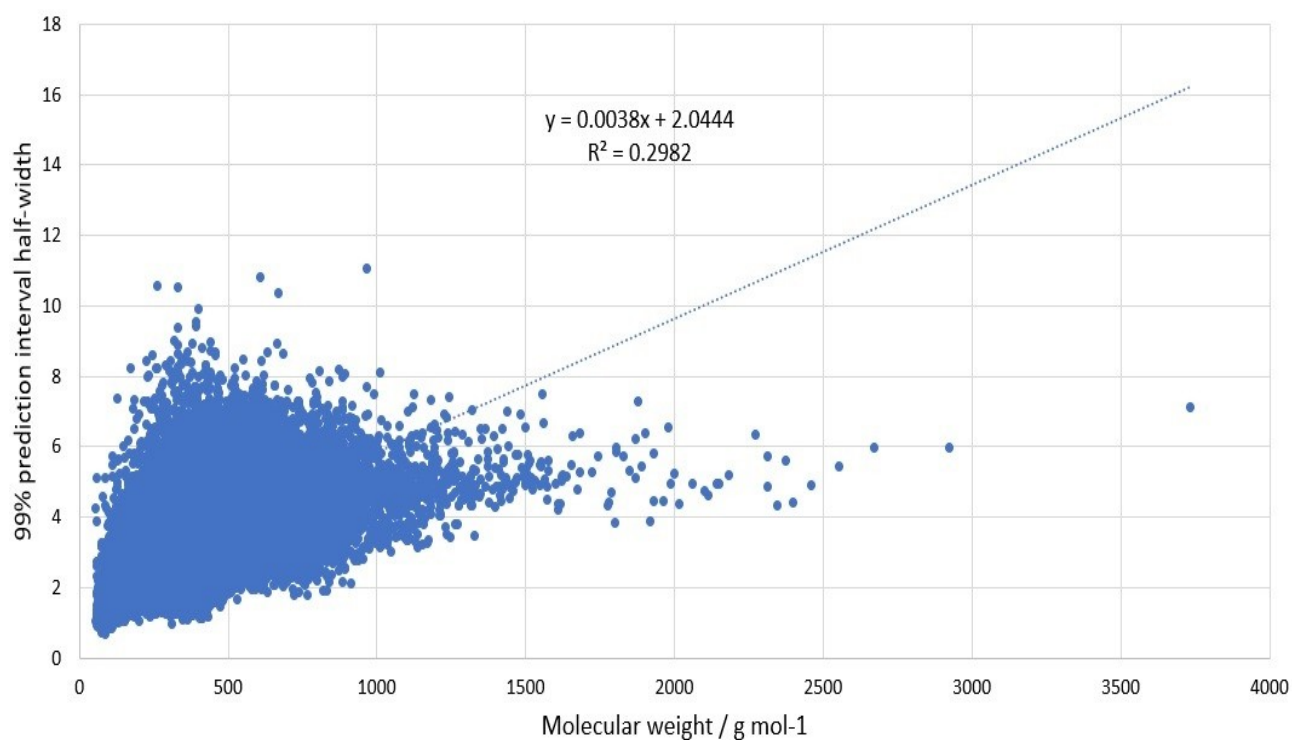

**Figure S4.** Prediction interval half-widths and Molecular weight of PubChem database. Prediction intervals are obtained using FSTI-XGB-EM-N of the AqSolDB-n data set.

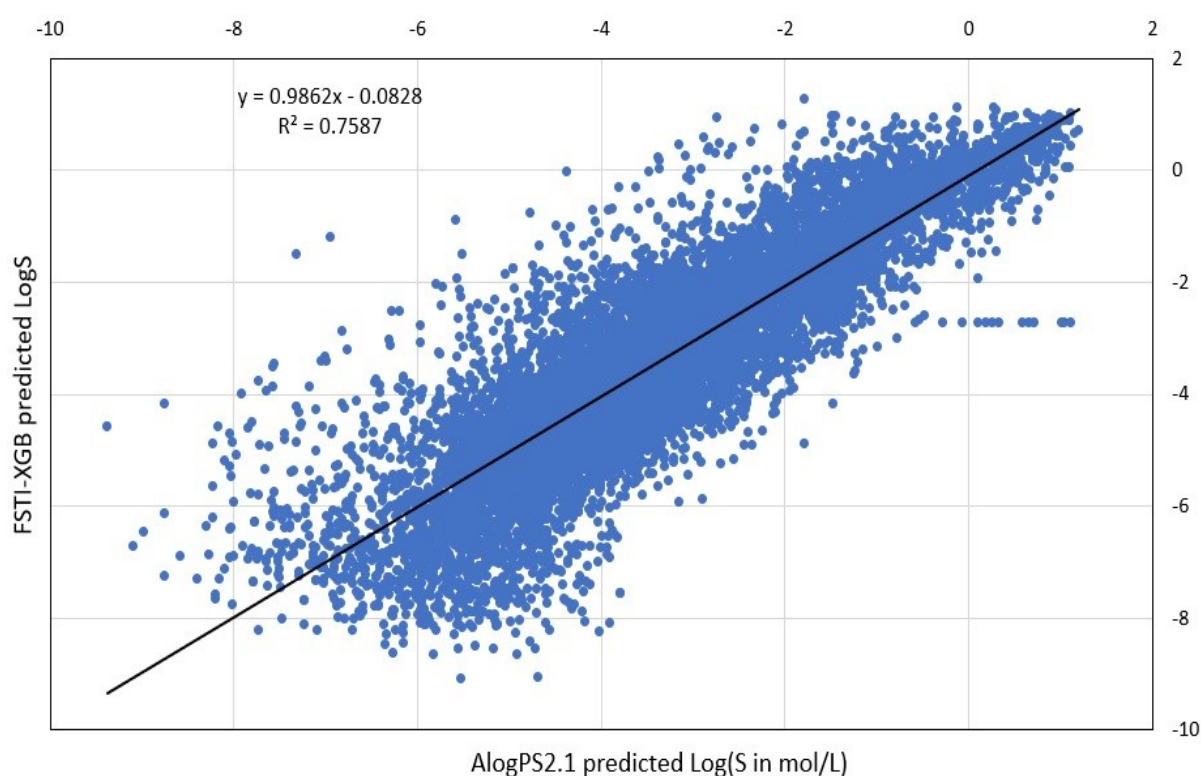

**Figure S5.** AlogPS2.1 [32] predicted and FSTI-XGB predicted solubilities of the Drugbank database on 10,861 molecular cases. For completeness, RMSE between FSTI-XGB and AlogPS2.1 values = 0.9645 Log(S).

## Info section S5: Python code for obtaining Padel and rdkit molecular descriptors from smiles

Obtaining\_mol\_descriptors:

# AFTER SMILES ARE COPY-PASTED FROM LARGEST CONTIGUOUS FRAGMENT OF ANY DATA SET (i.e. sheet) of Supplementary\_data\_sets\_table.xlsx to a new file and then the new file is named as "something".smi. Then "something".smi is put into the same directory where the python3 program is launched below

#Padel descriptors:

```
import numpy as np
import pandas
import pubchempy as pc
from pubchempy import get_compounds, Compound
import requests
from padelpy import from_smiles
import sys
from padelpy import padeldescriptor
```

# <https://github.com/ecrl/padelpy> options for padeldescriptor

```
padeldescriptor(mol_dir="something".smi', d_2d=True, maxruntime=30000, detectaromaticity=True, removesalt=True,
retain3d=True, retainorder=True, d_file='{file and its location to write Padel descriptors}.csv')
```

#rdkit descriptors:

```
import numpy as np
```

```
import rdkit
```

```
from rdkit import Chem
```

```
from rdkit.Chem import Descriptors
```

```
import pandas as pd
```

```
from rdkit.Chem import AllChem
num_lines=sum(1 for line in open('something'.smi'))
```

```
baseData = np.arange(1,1)
```

```
j=0
```

```
for i in range(num_lines):
```

```
    with open('something'.smi) as f:
```

```
        line=f.read().split("\n")[i]
```

```
        mol = Chem.MolFromSmiles(line)
```

```
        desc_MolWt = Descriptors.MolWt(mol)
```

```
        desc_MolLogP = Descriptors.MolLogP(mol)
```

```

desc_MolMR = Descriptors.MolMR(mol)

desc_HeavyAtomCount = Descriptors.HeavyAtomCount(mol)

desc_NumHAcceptors = Descriptors.NumHAcceptors(mol)

desc_NumHDonors = Descriptors.NumHDonors(mol)

desc_NumHeteroatoms = Descriptors.NumHeteroatoms(mol)

desc_NumRotatableBonds = Descriptors.NumRotatableBonds(mol)

desc_NumValenceElectrons = Descriptors.NumValenceElectrons(mol)

desc_NumAromaticRings = Descriptors.NumAromaticRings(mol)

desc_NumSaturatedRings = Descriptors.NumSaturatedRings(mol)

desc_NumAliphaticRings = Descriptors.NumAliphaticRings(mol)

desc_RingCount = Descriptors.RingCount(mol)

desc_TPSA = Descriptors.TPSA(mol)

desc_LabuteASA = Descriptors.LabuteASA(mol)

desc_BalabanJ = Descriptors.BalabanJ(mol)

desc_BertzCT = Descriptors.BertzCT(mol)

row
=[desc_MolWt,desc_MolLogP,desc_MolMR,desc_HeavyAtomCount,desc_NumHAcceptors,desc_NumHDonors,desc_
NumHeteroatoms,desc_NumRotatableBonds,desc_NumValenceElectrons,desc_NumAromaticRings,desc_NumSaturate
dRings,desc_NumAliphaticRings,desc_RingCount,desc_TPSA,desc_LabuteASA,desc_BalabanJ,desc_BertzCT]

if (j==0):

    baseData=row

else:

    baseData=np.vstack([baseData,row])

j=j+1

columnNames=["MolWt","MolLogP","MolMR","HeavyAtomCount","NumHAcceptors",
"NumHDonors","NumHeteroatoms","NumRotatableBonds","NumValenceElectrons","NumAromaticRings","NumSatur
atedRings","NumAliphaticRings","RingCount","TPSA","LabuteASA","BalabanJ","BertzCT"]

descriptors = pd.DataFrame(data=baseData,columns=columnNames)

pd.DataFrame(descriptors).to_csv("{file and its location to write rdkit descriptors}.csv")

```

## Info section S6: Calculation of ORCA SMD solvation Gibbs free

**energy** For two different conformations of a compound:

```
##### Input ORCA file name as "orca solv_En_1.txt"
```

```
! B97-D3 def2-TZVP tightopt
%maxcore 4000
```

```
* XYZFILE 0 1 md_1.xyz
```

```
$new_job
! B97-D3 def2-TZVP tightopt
%maxcore 4000
```

```
%cpcm smd true
SMDsolvent "Methanol"
end
```

```
* XYZFILE 0 1 solv_En_1.xyz
```

```
##### END of ORCA file
```

```
#####Commands in Terminal:
```

```
#!/bin/bash
```

```
orca solv_En_1.txt>solv_En_1.out.txt
```

```
grep -B 3 "OPTIMIZATION RUN DONE" solv_En_1.out.txt > Rezultati.txt
```

```
grep 'FINAL' Rezultati.txt > Rez.csv
```

```
cat Rez.csv | awk '{print $5}' > Rez_col.csv
```

```
R
```

```
A<-read.csv('Rez_col.csv',header=FALSE)
```

```
t<-t(A)
```

```
t<-as.vector(t)
```

```
write.csv(paste0("Delta G equals: ",(t[2]-t[1])*627.5),"Final_result.csv")
```

```
##### End of commands in Terminal, energy in kcal/mol is given in the final file. Do the
same for a different conformation, and take the average and the minimum energy as two QM
variables.
```

## Info section S7: Names and meaning of used QMvars for Methanol data set

"MW..g.mol.1." - Molecular weight of the whole API (all fragments)

" $\Delta H_{fus}$ ..kJ.mol.1." - Fusion enthalpy, values taken from pharmacopoeia

"Tm..K." - Melting point, values taken from pharmacopoeia

"Donor" - number of donor atoms of the whole API (all fragments)

"Acceptor" - number of acceptor atoms of the whole API (all fragments)

"deltaG.minE.in.vac" - Solvation Gibbs free energy in methanol using explicit model in ORCA DFT\*, minimum value of one or two calculated largest fragments conformations.

"IntraHbond.count" - number of intramolecular H-bonds

"deltaG.aver" - Solvation Gibbs free energy in methanol using explicit model in ORCA DFT\*, average value of one or two calculated largest fragments conformations.

"XlogP3.pubchem" - Values taken from PubChem as "Computed by XLogP3 3.0 (PubChem release 2021.05.07)"

"deltaG.MW" - is division of "deltaG.minE.in.vac" by "MW..g.mol.1..1"

"MW..g.mol.1..1" - Molecular weight of the API's largest contiguous fragment

"Donor.1" - number of donor atoms of the API's largest contiguous fragment

"Acceptor.1" - number of donor atoms of the API's largest contiguous fragment

\* See input file for calculation of Solvation Gibbs free energy in methanol using XYZ file of API's largest contiguous fragment conformation: orca\_solv\_G\_input.txt in Info section 6.

## Info section S8: Names of QMvars of Water-wide, Ethanol and Acetone data sets

With reference to Ref. 12, we give names for 41 used physicochemical descriptors 'QMvars':

MW = Molecular Weight

MP = Experimental melting point in Deg C

Volume = Molar volume in  $\text{cm}^3 \text{mol}^{-1}$

E0\_gas = Gas Phase Zero Point Energy in Ha

G\_gas = Gas Phase Gibbs Energy in Ha

E0\_solv = Solution Phase Zero Point Energy in Ha

G\_solv = Solution Phase Gibbs Energy in Ha

DeltaE0\_sol = E0\_solv - E0\_gas

DeltaG\_sol = G\_solv - G\_gas

HF\_E0\_gas = Gas Phase Zero Point Energy in Ha using HF SMD protocol

HF\_G\_gas = Gas Phase Gibbs Energy in Ha using HF SMD protocol

HF\_E0\_solv = Solution Phase Zero Point Energy in Ha using HF SMD protocol

HF\_G\_solv = Solution Phase Gibbs Energy in Ha using HF SMD protocol

HF\_DeltaE0\_sol = E0\_solv - E0\_gas using HF SMD protocol

HF\_DeltaG\_sol = G\_solv - G\_gas using HF SMD protocol

gas\_dip = Gas phase dipole

solv\_dip = Solution phase dipole

HOMO = HOMO energy in eV

LUMO = LUMO energy in eV

LsoluHsolv = LUMO of molecule - HOMO of solvent

LsolvHsolu = LUMO of solvent - HOMO of solute

SASA = Solvent Accessible Surface Area

O\_charges = Sum of charges on oxygen atoms

C\_charges = Sum of charges on carbon atoms

Most\_neg = Charge of most negative atom

Most\_pos = Charge of most positive atom

Het\_charges = Sum of charges on non-carbon or non-hydrogen atoms

N\_atoms = Number of atoms

Area1 = Area of 1st shadow projection

Area2 = Area of 2nd shadow projection (perpendicular to 1st)

Area3 = Area of 3rd shadow projection (perpendicular to 1st and 2nd)

Asp1 = Aspect Ratio of 1st shadow projection

Asp2 = Aspect Ratio of 2nd shadow projection (perpendicular to 1st)

Asp3 = Aspect Ratio of 3rd shadow projection (perpendicular to 1st and 2nd)

No\_regions = Number of regions of high/low charges on molecular surface

Tot\_charge = Total high/low charge area on molecular surface

Neg\_charge = Total low charge area on molecular surface

Pos\_charge = Total high charge area on molecular surface

Big\_area = Area of biggest region of high/low charge on molecular surface

Big\_charge = Average charge of biggest area of high/low charge on molecular surface

Big\_std = Standard deviation of charge of biggest area of high/low charge on molecular surface

### Info section S9: Calculation of NC measure for any number of calibration samples of certain confidence levels

To obtain an NC measure that equals exactly 99%, 95%, or 90% confidence level, one would need to have  $100 \times l - 1$  number of samples in the calibration. That would imply that all data sets without such a number of calibration samples cannot be used with CP regressor for estimation of the mentioned confidence levels. We dissent with such implication. If, in our case, we have a data set of 8091 examples (i.e. samples), the closest top-down ordered NC measures would be the 80th and 81st examples. So 80th top-down sorted NC measure would represent  $(8091-80+1)/(8091+1)\%$  confidence, i.e. means 0,99011% confidence level, while 81st sample would be  $(8091-81+1)/(8091+1)\%$ , i.e., 0.98999% confidence level. Neither of these two is exactly 99%. But a 99% confidence level would be vicinal to these two points. In that, case, one can select any of these two NC measures by multiplying it by a linear factor  $f$ . The  $f$  is defined according to the 99% confidence intercept of the line spanned between the points  $(\alpha_{81}, 0.98999\%)$  and  $(\alpha_{80}, 0.99011\%)$ , and as  $(x_1, y_1)$  and  $(x_2, y_2)$ , respectively. The general equations for the case of any confidence level ( $c$ ), number of calibration samples in the data set ( $B$ ), and determined NC-s (all  $\alpha$  values) for the whole calibration set are below:

$const = 100 * (c + 0.01)$  # for  $c$  as confidence level (e.g. 0.99, 95%, etc..)

$y_2 = (B - (((B+1) \% \% const) - 1)) / (B+1)$

$y_1 = (B - ((B+1) \% \% const)) / (B+1)$

$x_2 = (sort(\alpha, decreasing=TRUE)[(B+1) \% \% const])$

$x_1 = (sort(\alpha, decreasing=TRUE)[((B+1) \% \% const) + 1])$

$f = (((1 - (1/const)) - y_1) * (x_2 - x_1) / (y_2 - y_1)) + x_1 / sort(\alpha, decreasing=TRUE)[(B+1) \% \% const]$

These equations were applied for all studied data sets and all confidence levels in relation to CP, except data sets (1,3) as Methanol and AqSolDB-n had 99 and 1399 training (i.e., calibration) samples for cross-conformal prediction, respectively. So, data sets (1,3) do not need this adjustment.

The rationale for this, is that between two vicinal points, a linearly estimated value of  $\alpha$  for set confidence can be approximated for the case of enough high number of calibration samples in the data set. This is because any non-linear curve can be linearly presented at its narrow range of the curve (e.g., between 0.9898% and 0.9902%).
